# Supplementary material for: A refined TALDICE-1a age scale from 55 to 112 ka before present for the Talos Dome ice core based on high-resolution methane measurements
Source: Copernicus journal article supplement (doi:10.5194/cp-7-1001-2011), 2011-09-26
Supplement: Supplementary file 1 [file TALDICE_CH4_Ca2+_schuepbach11cp.xls]

## Sheet: Readme
Description of TALDICE CH4 and Ca2+ CFA data 1239-1380 m
In this file the high-resolution CH4 data and the Ca2+ data in 50 cm resolution published by Schüpbach et al., 2011, Clim. Past, are archived.
Please cite the reference below when using this data.
REFERENCE
S. Schüpbach, U. Federer, M. Bigler, H. Fischer, T.F. Stocker
A refined TALDICE-1a age scale from 55 to 112 ka before present for the Talos Dome ice core based on
high-resolution methane measurements
Clim. Past, 2011

## Sheet: CH4
Column 1: Depth from top (m)
Column 2: gas age (yrs before 1950, TALDICE-1a age scale)
Column 3: CH4 concentration (ppbv)
Depth	gas age TALDICE-1a	CH4 conc.
(m)	(yrs BP)	(ppbv)
1223.17	52887.4	542.723
1223.33	52907.7	541.072
1223.5	52929.2	537.748
1223.67	52950.7	534.836
1223.83	52971	530.848
1224.17	53013.5	522.933
1224.33	53033.3	516.68
1224.5	53054.2	517.687
1224.67	53075.2	523.64
1224.83	53095	535.051
1226.17	53263.1	547.023
1226.33	53282.6	546.757
1226.5	53303.4	533.15
1226.67	53324.2	515.025
1226.83	53343.7	501.754
1227.17	53385.5	500.128
1227.33	53405.3	508.12
1227.5	53426.2	516.158
1227.67	53447.2	513.548
1228.17	53509.4	502.827
1228.33	53529.5	496.586
1228.5	53550.8	488.769
1228.67	53572.2	467.956
1228.83	53592.3	449.021
1229.17	53636.4	447.103
1229.33	53657.8	450.477
1229.5	53680.4	445.741
1229.67	53703.1	437.563
1229.83	53724.5	435.735
1230.14	53766.4	440.145
1230.29	53787	442.228
1230.43	53806.2	439.903
1230.57	53825.3	439.684
1230.71	53844.5	444.362
1230.86	53865.1	451.719
1231.17	53907.8	457.956
1231.33	53929.8	459.862
1231.5	53953.3	459.95
1231.67	53976.8	460.662
1231.83	53998.8	460.013
1232.17	54047.5	461.752
1232.33	54071.1	469.945
1232.5	54096.3	475.325
1232.67	54121.5	470.906
1232.83	54145.1	467.433
1233.17	54196.1	471.63
1233.33	54220.3	475.042
1233.5	54246.1	478.906
1233.67	54271.8	491.977
1234.17	54347.1	504.629
1234.33	54370.9	500.947
1234.5	54396.2	481.272
1234.67	54421.6	459.502
1234.83	54445.4	449.627
1235.17	54496.2	451.941
1235.33	54520.1	457.39
1235.5	54545.6	462.043
1235.67	54571.1	465.738
1235.83	54595	468.523
1236.17	54647.2	472.469
1236.33	54672.4	480.568
1236.5	54699.2	497.544
1236.67	54725.9	524.442
1238.33	54999.5	548.332
1238.67	55055.9	553.806
1239.2	55135.9	539.861
1239.4	55161.2	516.88
1239.6	55186.4	500.635
1239.8	55211.7	495.448
1240.17	55258.6	486.306
1240.33	55279.1	470.399
1240.5	55300.8	462.358
1240.67	55322.5	463.783
1240.83	55343	466.072
1241.17	55386.7	467.58
1241.33	55407.5	473.405
1241.5	55429.5	487.579
1241.67	55451.5	499.532
1241.83	55472.3	503.11
1244.5	55826.2	517.148
1245.17	55916.8	544.031
1245.33	55938.7	559.984
1245.5	55961.9	560.995
1245.67	55985.2	562.998
1245.83	56007.1	571.654
1248.17	56333.5	577.972
1248.33	56356.3	576.605
1248.5	56380.4	575.11
1248.67	56404.6	579.394
1248.83	56427.4	586.217
1249.17	56476	589.499
1249.33	56499	586.003
1249.5	56523.4	580.982
1249.67	56547.8	581.209
1249.83	56570.8	589.709
1255.17	57358.5	570.839
1255.33	57382.7	548.806
1255.5	57408.3	514.856
1255.67	57434	487.247
1255.83	57458.2	471.376
1256.17	57513.5	466.567
1256.33	57541.4	467.691
1256.5	57570.9	473.505
1256.67	57600.5	483.881
1256.83	57628.4	496.716
1257.17	57687.9	505.681
1257.33	57715.9	511.265
1257.5	57745.8	522.745
1257.67	57775.7	533.018
1257.83	57803.7	531.027
1258.17	57863.6	530.641
1258.33	57891.8	543.738
1258.5	57921.8	556.606
1258.67	57951.7	556.138
1258.83	57979.9	549.067
1259.17	58040	548.97
1259.33	58068.4	558.786
1259.5	58098.5	570.6
1259.67	58128.6	580.161
1259.83	58157	585.476
1260.17	58214.9	576.451
1260.33	58241.2	550.443
1260.5	58269	520.26
1260.67	58296.8	495.727
1260.83	58323.1	482.209
1261.17	58378.9	481.828
1261.33	58405.2	484.263
1261.5	58433.2	483.144
1261.67	58461.2	491.367
1261.83	58487.5	520.308
1262.33	58570.1	553.948
1262.67	58626.5	561.57
1263.17	58714.7	537.49
1263.33	58746.4	503.228
1263.5	58780	478.373
1263.67	58813.6	469.335
1263.83	58845.3	467.07
1264.17	58912.7	457.78
1264.33	58944.6	441.364
1264.5	58978.4	425.859
1264.67	59012.3	415.254
1264.83	59044.2	413.266
1266.17	59312.6	425.269
1266.33	59344.9	442.788
1266.5	59379.2	449.136
1266.67	59413.5	445.468
1266.83	59445.8	443.993
1267.17	59514.7	449.624
1267.33	59547.2	456.279
1267.5	59581.8	455.229
1267.67	59616.4	452.355
1267.83	59648.9	461.518
1268.17	59718.3	478.091
1268.5	59785.8	484.761
1268.67	59820.6	482.972
1269.17	59923.2	484.392
1269.33	59956.2	486.145
1269.5	59991.2	481.236
1269.67	60026.3	465.099
1271.17	60337.2	440.962
1271.33	60370.6	425.346
1271.5	60406.1	422.639
1271.67	60441.6	420.705
1271.83	60475	414.576
1272.2	60552.6	409.142
1272.4	60594.8	408.811
1272.6	60636.9	412.848
1272.8	60679.1	419.535
1273.2	60763.7	427.377
1273.4	60806.1	432.971
1273.6	60848.6	436.218
1273.8	60891	446.411
1275.4	61233.7	435.004
1287.12	63900.6	491.164
1287.25	63930.9	472.253
1287.38	63961.2	456.969
1287.5	63991.5	437.293
1287.75	64052.1	424.184
1287.88	64082.4	425.353
1288	64112.7	427.13
1288.25	64196.5	420.408
1288.88	64405.9	415.221
1289	64447.8	417.04
1289.12	64490.1	422.149
1289.25	64532.4	427.399
1289.38	64574.7	433.646
1289.5	64617.1	441.993
1289.62	64659.4	448.649
1289.75	64701.7	451.006
1290	64786.3	455.534
1290.12	64829	469.669
1290.25	64871.7	483.171
1290.38	64914.4	478.361
1290.5	64957.1	464.077
1290.62	64999.8	460.696
1290.75	65042.5	463.716
1290.88	65085.2	463.772
1291	65127.9	464.845
1291.25	65214.1	466.681
1292.5	65646.9	464.961
1292.62	65690.4	458.813
1292.75	65733.9	451.055
1292.88	65777.5	446.297
1293.14	65871.3	443.471
1293.29	65921.6	444.941
1293.43	65971.9	457.974
1293.57	66022.3	472.427
1293.71	66072.6	470.41
1293.86	66122.9	459.42
1294	66173.2	461.779
1294.12	66217.7	475.421
1294.25	66262.2	482.099
1294.38	66306.8	475.794
1294.5	66351.3	461.916
1294.62	66395.8	456.817
1294.75	66440.4	469.09
1294.88	66484.9	479.036
1295	66529.4	472.062
1295.12	66574.4	463.424
1295.25	66619.4	468.437
1295.38	66664.5	481.941
1295.62	66754.5	492.191
1295.75	66799.6	490.751
1295.88	66844.6	478.338
1296	66889.6	469.296
1296.14	66941.7	470.929
1296.29	66993.8	470.56
1296.43	67045.9	457.055
1296.57	67098.1	440.139
1297	67254.4	436.219
1297.12	67300.6	441.279
1297.25	67346.9	443.447
1297.38	67393.1	444.937
1297.5	67439.4	450.851
1297.62	67485.6	460.814
1297.75	67531.9	468.399
1297.88	67578.1	469.966
1298	67624.4	472.053
1298.14	67678.2	470.963
1298.29	67732.1	461.124
1298.43	67785.9	457.21
1298.57	67839.8	461.38
1298.71	67893.6	456.251
1298.86	67947.5	448.412
1299	68001.3	456.821
1299.14	68056.5	468.558
1299.29	68111.6	459.796
1299.43	68166.8	440.707
1299.57	68222	438.533
1299.86	68332.3	456.715
1300	68387.5	477.076
1300.12	68437.3	488.386
1300.38	68537	487.986
1300.5	68586.9	472.727
1300.62	68636.7	449.696
1300.75	68686.5	433.016
1300.88	68736.4	431.605
1301	68786.2	442.41
1301.14	68845.2	450.203
1301.43	68963.3	445.703
1301.57	69022.4	433.449
1301.86	69140.5	422.738
1302.5	69412.2	420.329
1302.75	69518.6	426.846
1302.88	69571.8	437.182
1303	69625	443.582
1303.12	69680.1	445.083
1303.25	69735.2	449.122
1303.38	69790.4	458.256
1303.5	69845.5	462.94
1303.62	69900.6	455.138
1303.75	69955.8	446.828
1303.88	70010.9	453.4
1304	70066	468.421
1305.12	70585.1	476.821
1305.25	70644.7	477.476
1305.38	70704.3	480.249
1305.5	70763.9	488.337
1305.62	70823.5	496.289
1305.75	70883.1	496.127
1305.88	70942.7	477.995
1306.25	71092.9	445.524
1306.5	71183.6	420.788
1306.62	71228.9	415.202
1306.75	71274.2	421.407
1306.88	71319.6	434.496
1307.38	71505.3	451.894
1307.5	71552.1	464.208
1307.62	71598.9	462.52
1307.75	71645.7	452.715
1308	71739.3	451.359
1309.25	72235.6	458.175
1309.38	72287.1	460.058
1309.5	72338.5	458.397
1309.62	72389.9	458.46
1309.75	72441.4	455.867
1309.88	72492.8	449.605
1310	72544.2	441.912
1311.12	73028.1	431.469
1311.62	73250	422.425
1311.75	73305.5	422.695
1311.88	73361	429.823
1312	73416.5	436.518
1312.12	73473.8	444.938
1312.38	73588.2	456.681
1312.5	73645.5	462.034
1312.62	73702.8	457.039
1312.75	73760	452.22
1312.88	73817.2	456.121
1313	73874.5	464.34
1313.12	73933.3	468.475
1313.5	74109.6	468.807
1313.75	74227.1	470.127
1313.88	74285.8	471.889
1314	74344.6	474.779
1314.29	74482.1	482.306
1314.43	74550.9	482.245
1314.57	74619.6	459.425
1314.71	74688.4	430.215
1314.86	74757.1	419.783
1315	74825.9	423.958
1315.14	74888.7	427.475
1315.29	74951.6	426.434
1315.43	75014.4	423.363
1315.57	75077.2	423.443
1315.71	75140	425.065
1315.86	75202.9	424.526
1316	75265.7	429.842
1316.14	75329.3	439.521
1316.29	75392.8	442.959
1316.43	75456.4	445.382
1316.57	75519.9	447.147
1316.86	75647	437.872
1317.29	75839	424.592
1317.43	75903.2	420.873
1317.57	75967.3	428.488
1317.71	76031.5	437.941
1318	76159.9	438.414
1318.14	76224.5	438.082
1318.29	76289.2	445.061
1318.43	76353.8	453.631
1318.57	76418.5	463.636
1318.71	76483.1	467.524
1318.86	76547.8	458.282
1319	76612.4	452.473
1319.29	76742.3	456.539
1319.57	76872.2	454.23
1319.86	77002.1	445.417
1320	77067	443.712
1320.43	77261.9	445.575
1320.57	77326.8	442.585
1320.71	77391.8	438.06
1320.86	77456.7	440.282
1321	77521.7	457.024
1321.14	77586.7	482.681
1321.29	77651.7	495.989
1321.43	77716.7	488.052
1321.57	77781.6	477.298
1321.71	77846.6	479.478
1321.86	77911.6	486.053
1322	77976.6	488.772
1322.29	78107	491.448
1322.57	78237.4	496.128
1322.71	78302.6	503.661
1322.86	78367.8	513.773
1323	78433	521.282
1323.14	78498.4	522.02
1323.43	78629.2	517.823
1323.71	78759.9	516.572
1323.86	78825.3	521.868
1324	78890.7	525.343
1325.43	79547.3	522.199
1325.57	79613.2	521.346
1325.71	79679	527.893
1325.86	79744.8	537.34
1326	79810.6	547.212
1326.14	79869.2	553.478
1326.29	79927.8	553.383
1326.43	79986.4	549.77
1326.71	80103.7	543.677
1327	80220.9	539.309
1327.14	80280.2	539.349
1327.29	80339.5	538.782
1327.43	80398.8	536.06
1327.57	80458.2	534.287
1327.71	80517.5	537.7
1327.86	80576.8	546.778
1328.14	80696.3	554.714
1328.29	80756.5	556.756
1328.43	80816.7	556.686
1328.57	80876.8	562.723
1328.71	80937	574.549
1328.86	80997.2	583.658
1329	81057.4	589.846
1329.14	81118.1	594.802
1329.29	81178.7	596.102
1329.43	81239.4	598.18
1329.57	81300	602.166
1329.71	81360.7	601.08
1329.86	81421.3	596.24
1330	81482	591.134
1330.14	81543.2	580.217
1330.43	81665.7	565.664
1330.57	81727	563.551
1331	81910.7	577.274
1331.14	81972.3	588.701
1331.29	82034	589.925
1331.43	82095.6	593.102
1331.71	82218.8	601.11
1331.86	82280.5	607.476
1332	82342.1	616.116
1332.12	82447.2	628.251
1332.25	82552.3	638.231
1332.38	82657.4	646.09
1332.75	82972.6	647.69
1332.88	83077.7	635.219
1333	83182.8	600.438
1333.14	83249	536.692
1333.29	83315.1	472.601
1333.43	83381.3	455.672
1333.57	83447.5	484.376
1333.86	83579.8	518.241
1334	83646	530.537
1334.12	83703.9	513.035
1334.38	83819.7	476.527
1334.5	83877.6	447.969
1334.62	83935.5	436.73
1334.75	83993.4	433.492
1334.88	84051.3	435.878
1335.25	84237	440.113
1335.38	84300.9	439.076
1335.5	84364.9	436.623
1335.62	84428.8	432
1335.75	84492.7	420.726
1335.88	84556.6	416.637
1336.25	84748.4	428.553
1336.38	84812.4	440.984
1336.5	84876.4	442.364
1336.62	84940.4	438.583
1336.75	85004.4	436.37
1336.88	85068.3	433.996
1337	85132.3	429.926
1337.12	85196.6	429.51
1337.25	85260.8	434.624
1337.62	85453.6	437.531
1337.75	85517.8	436.135
1337.88	85582.1	437.051
1338	85646.3	436.483
1338.12	85711.1	429.818
1338.5	85905.4	426.48
1338.62	85970.1	430.515
1338.75	86034.9	435.557
1339.25	86295.7	438.19
1339.38	86361.4	440.009
1339.5	86427	441.124
1339.62	86492.6	439.433
1339.75	86558.3	438.748
1339.88	86623.9	443.412
1340	86689.6	451.812
1343.25	88478.4	460.619
1343.38	88550.4	466.658
1343.5	88622.4	472.214
1343.62	88694.4	479.187
1343.75	88766.4	481.316
1343.88	88838.3	476.483
1344	88910.3	466.488
1346.25	90238.6	452.909
1346.75	90534.1	443.225
1346.88	90607.9	440.058
1348.12	91346.6	436.206
1348.25	91420.4	427.501
1348.62	91642	419.064
1348.75	91715.9	416.573
1348.88	91789.7	417.67
1349	91863.6	421.402
1349.25	92011.3	428.295
1349.38	92085.2	433.517
1349.5	92159.1	436.538
1349.62	92232.9	438.332
1349.75	92306.8	437.514
1349.88	92380.6	436.61
1350.12	92528.4	436.812
1350.25	92602.2	437.293
1350.38	92676.1	438.206
1350.5	92750	440.936
1350.62	92823.9	446.619
1350.75	92897.8	448.85
1351.12	93119.4	440.665
1351.38	93267.1	430.442
1351.5	93340.9	433.769
1351.62	93414.8	449.086
1351.75	93488.7	457.324
1352.25	93784.1	448.087
1352.38	93858	432.72
1352.5	93931.9	425.488
1352.62	94005.7	425.885
1352.75	94079.6	427.434
1352.88	94153.4	429.442
1353	94227.3	432.911
1353.25	94375	433.572
1353.38	94448.9	430.651
1353.5	94522.8	430.421
1353.75	94670.5	431.758
1353.88	94744.3	431.016
1354	94818.2	432.458
1354.25	94965.9	436.498
1354.38	95039.8	440.689
1354.88	95335.2	451.105
1356.38	96193.3	472.046
1356.62	96322.1	492.921
1356.75	96386.6	497.526
1356.88	96451	483.94
1358.29	97165.9	476.774
1358.43	97237.3	470.17
1358.57	97308.7	474.518
1359.12	97584.6	481.216
1359.25	97646.5	485.31
1359.38	97708.4	484.017
1359.5	97770.2	475.203
1359.62	97832.1	468.186
1359.75	97893.9	476.484
1359.88	97955.8	495.224
1360.25	98141.1	506.944
1360.38	98202.9	507.545
1360.5	98264.6	506.126
1360.62	98326.4	508.095
1360.75	98388.2	514.368
1360.88	98449.9	524.354
1363.12	99573.8	532.503
1363.25	99637.8	532.918
1363.38	99701.7	525.464
1363.5	99765.6	516.268
1363.62	99829.5	512.474
1363.75	99893.4	515.028
1363.88	99957.4	522.063
1364.29	100171	530.651
1364.43	100246	535.212
1364.57	100321	535.827
1364.71	100396	539.695
1364.86	100471	545.685
1365	100545	544.956
1365.12	100613	537.508
1365.25	100680	529.577
1365.38	100747	526.962
1365.5	100814	529.709
1365.62	100882	530.318
1365.75	100949	528.893
1365.88	101016	531.541
1366	101084	539.306
1366.25	101223	548.951
1366.38	101292	551.879
1366.62	101431	544.064
1366.75	101501	533.888
1366.88	101570	529.246
1367	101640	524.893
1367.25	101748	511.139
1367.38	101803	491.91
1367.75	101966	476.593
1367.88	102020	469.753
1368	102074	475.96
1368.5	102364	486.56
1368.62	102436	482.967
1368.75	102508	468.199
1368.88	102581	463.713
1369.25	102805	476.584
1369.38	102881	490.285
1369.5	102957	489.914
1369.62	103033	485.19
1370	103262	496.435
1370.12	103342	522.846
1370.38	103503	543.799
1370.5	103584	550.618
1370.62	103665	552.84
1370.75	103745	555.425
1370.88	103826	557.451
1371	103906	569.646
1372.12	104676	595.984
1372.38	104854	617.961
1372.5	104942	628.685
1372.75	105120	634.033
1372.88	105209	625.757
1373.25	105483	604.789
1373.38	105576	593.723
1373.5	105668	601.027
1373.62	105761	611.223
1373.75	105854	612.715
1373.88	105947	608.712
1374	106040	603.726
1374.12	106136	596.287
1374.25	106232	585.747
1374.38	106328	579.132
1374.5	106424	581.493
1374.62	106519	585.957
1374.75	106615	580.928
1374.88	106711	556.605
1377.12	108929	512.026
1377.25	109052	492.442
1377.38	109174	488.729
1377.62	109419	485.748
1377.75	109542	484.61
1377.88	109665	488.713
1378.25	110024	494.944
1378.38	110142	503.044
1378.5	110260	513.8
1378.62	110378	526.032
1378.75	110497	535.498
1379.25	110965	536.818
1379.38	111081	530.546
1379.5	111196	520.858
1379.62	111312	511.624
1379.75	111428	507.839
1379.88	111544	508.171

## Sheet: Ca2+
Column 1: Depth from top (m)
Column 2: ice age (yrs before 1950, TALDICE-1a age scale)
Column 3: Ca2+ concentration (ppbw)
Depth	ice age TALDICE-1a	Ca2+
(m)	(yrs BP)	(ppbw)
1220.49	53587.4	2.70803
1220.99	53644.4	2.88602
1221.49	53705.9	2.96985
1221.99	53767.4	3.18191
1222.49	53827.9	4.06905
1222.99	53888.4	3.62603
1223.49	53948.4	4.82035
1223.99	54008.4	3.79455
1224.49	54070.4	4.41099
1224.99	54132.4	4.99382
1225.49	54200.3	9.02242
1225.99	54268.3	3.99656
1226.49	54335.3	5.1305
1226.99	54402.3	4.45377
1227.49	54468.3	5.25405
1227.99	54534.3	5.62894
1228.49	54602.8	NaN
1228.99	54671.3	5.62977
1229.49	54744.8	5.27662
1229.99	54818.3	6.05646
1230.49	54896.2	6.45172
1230.99	54974.2	6.21383
1231.49	55048.3	5.6878
1231.99	55122.3	5.60591
1232.49	55196.8	4.70106
1232.99	55271.3	6.20788
1233.49	55348.7	5.1109
1233.99	55426.2	4.98921
1234.49	55505.2	6.30414
1234.99	55584.2	5.44049
1235.49	55666.7	6.26411
1235.99	55749.2	6.24346
1236.49	55835.6	6.31755
1236.99	55922.1	8.02067
1237.49	56013.1	7.48674
1237.99	56104.1	7.62877
1238.49	56198.6	7.09068
1238.99	56293.1	7.67476
1239.49	56365.3	7.74973
1239.99	56437.3	7.33966
1240.49	56507.3	6.63917
1240.99	56577.3	6.70311
1241.49	56645.8	7.33011
1241.99	56714.3	8.52938
1242.49	56780.3	9.12591
1242.99	56846.3	6.79993
1243.49	56908.9	6.03734
1243.99	56971.4	5.58655
1244.49	57033.4	6.75046
1244.99	57095.4	6.67996
1245.49	57155.9	2.5228
1245.99	57216.4	4.73667
1246.49	57275.4	6.72859
1246.99	57334.4	4.13387
1247.49	57394.9	4.98496
1247.99	57455.4	5.04196
1248.49	57518.9	3.82836
1248.99	57582.4	4.3437
1249.49	57649.3	3.30285
1249.99	57716.3	3.3673
1250.49	57784.3	4.96215
1250.99	57852.3	4.9417
1251.49	57919.3	4.39891
1251.99	57986.3	5.43632
1252.49	58053.8	4.57831
1252.99	58121.3	4.27455
1253.49	58190.3	5.70953
1253.99	58259.3	3.65083
1254.49	58331.8	3.52211
1254.99	58404.3	3.40669
1255.49	58477.8	3.877
1255.99	58551.3	4.43283
1256.49	58633.7	5.60995
1256.99	58716.2	NaN
1257.49	58797.2	NaN
1257.99	58878.2	3.22609
1258.49	58961.2	4.28514
1258.99	59044.2	3.25162
1259.49	59127.7	3.19768
1259.99	59211.2	4.78179
1260.49	59285.8	3.44405
1260.99	59360.3	2.61692
1261.49	59433.8	NaN
1261.99	59507.3	4.95933
1262.49	59587.7	4.42866
1262.99	59668.2	5.16941
1263.49	59767.5	4.98753
1263.99	59867	5.58117
1264.49	59971.5	4.97943
1264.99	60076	5.58799
1265.49	60177.5	6.46799
1265.99	60279	6.72629
1266.49	60383.9	7.33886
1266.99	60488.9	7.15463
1267.49	60594.9	6.97018
1267.99	60700.9	8.02953
1268.49	60806.4	6.99325
1268.99	60911.9	6.78076
1269.49	61018.9	6.5107
1269.99	61125.9	7.15416
1270.49	61236.9	7.05613
1270.99	61347.9	6.38697
1271.49	61460.4	9.42731
1271.99	61572.9	11.7091
1272.49	61685.9	NaN
1272.99	61798.9	8.43925
1273.49	61909.4	8.12361
1273.99	62019.9	8.54257
1274.49	62129.4	NaN
1274.99	62238.9	9.48622
1275.49	62346.4	8.14381
1275.99	62453.9	7.55422
1276.49	62563.4	NaN
1276.99	62672.9	NaN
1277.49	62786.4	NaN
1277.99	62899.9	NaN
1278.49	63022.3	NaN
1278.99	63144.8	NaN
1279.49	63271.2	NaN
1279.99	63397.7	11.5467
1280.49	63526.7	13.1237
1280.99	63655.7	12.3253
1281.49	63784.2	12.5687
1281.99	63912.7	9.6328
1282.49	64038.7	7.80319
1282.99	64164.7	7.52454
1283.49	64288.8	10.1541
1283.99	64412.8	8.72679
1284.49	64532.8	9.82001
1284.99	64652.8	10.6182
1285.49	64765.4	9.87329
1285.99	64877.9	8.88368
1286.49	64986.9	10.5348
1286.99	65095.9	9.12445
1287.49	65205.4	9.97108
1287.99	65314.9	11.3952
1288.49	65470.9	11.9232
1288.99	65627.4	12.5385
1289.49	65795.3	15.3339
1289.99	65963.3	11.9408
1290.49	66140.7	12.051
1290.99	66318.2	12.1202
1291.49	66493.2	12.3319
1291.99	66668.2	11.4093
1292.49	66843.7	11.8989
1292.99	67019.2	12.5798
1293.49	67199.2	13.8486
1293.99	67379.2	14.8493
1294.49	67560.7	14.4747
1294.99	67742.2	13.935
1295.49	67919.2	13.0098
1295.99	68096.2	12.5089
1296.49	68279.7	12.2289
1296.99	68463.2	7.45847
1297.49	68650.1	9.1366
1297.99	68837.1	10.1754
1298.49	69020.7	12.9206
1298.99	69204.2	10.089
1299.49	69391.1	7.97666
1299.99	69578.1	5.75659
1300.49	69766.6	4.89929
1300.99	69955.1	3.75844
1301.49	70143.6	4.04909
1301.99	70332.1	4.02983
1302.49	70510.2	2.5994
1302.99	70688.2	2.36542
1303.49	70880.6	2.7377
1303.99	71073.1	2.4019
1304.49	71292.8	4.11259
1304.99	71512.8	3.31598
1305.49	71770.9	3.25979
1305.99	72029.4	3.27993
1306.49	72234.9	4.96803
1306.99	72439.9	6.3513
1307.49	72639	5.52051
1307.99	72838	5.48387
1308.49	73018.7	4.05493
1308.99	73199.2	3.63645
1309.49	73373.8	3.03234
1309.99	73548.3	3.51668
1310.49	73736.6	3.43832
1310.99	73925.1	3.12054
1311.49	74136.4	2.8621
1311.99	74347.9	2.16856
1312.49	74588.6	2.4477
1312.99	74829.6	2.80131
1313.49	75096.3	3.2344
1313.99	75363.3	3.24626
1314.49	75631.3	4.02373
1314.99	75899.3	6.35006
1315.49	76120.3	6.33921
1315.99	76340.8	4.46603
1316.49	76552.9	5.68221
1316.99	76764.9	4.36418
1317.49	76981.8	3.97101
1317.99	77198.8	4.38565
1318.49	77423.8	4.07962
1318.99	77648.8	3.97024
1319.49	77878.2	3.52664
1319.99	78107.7	3.4864
1320.49	78330.8	3.20758
1320.99	78553.8	3.16499
1321.49	78771.8	2.99429
1321.99	78989.8	3.17509
1322.49	79207.8	2.63526
1322.99	79425.8	2.44148
1323.49	79643.8	2.22425
1323.99	79861.8	2.65818
