# Supplementary material for: A refined TALDICE-1a age scale from 55 to 112 ka before present for the Talos Dome ice core based on high-resolution methane measurements
Source: Copernicus journal article supplement (doi:10.5194/cp-7-1001-2011), 2011-09-26
Supplement: Supplementary file 2 [file TALDICE_age_scale_schuepbach11cp.xls]

## Sheet: Readme
Description of TALDICE-1 and TALDICE-1a age scale for the Talos Dome ice core
See also the official TALDICE homepage www.taldice.org for additional documentation of TALDICE.
The Talos Dome ice core (East Antarctica, 159° 11' E, 72° 49' S) reaches down to a depth of 1620 m.
A first official age scale TALDICE-1 of the Talos Dome ice core, covering the depth 0-1583m (0-314 ka BP), has been
published by Buiron et al., 2011.
A refinement of the age scale in the depth interval 1239-1380m (56-112 ka BP), TALDICE-1a, has been published
by Schüpbach et al., 2011.
In this file the refined TALDICE-1a is archived. Please use the age scale as archived in this file.
When using the dating for TALDICE please refer to the following references:
REFERENCES
The dating of 0-55 ka BP (depth: 0-1239 m) and 112-314 ka BP (depth: 1380-1583 m) is described in the paper:
D. Buiron, J. Chappellaz, B. Stenni, M. Frezzotti, M. Baumgartner, E. Capron, A. Landais,
B. Lemieux-Dudon, V. Masson-Delmotte, M. Montagnat, F. Parrenin, and A. Schilt
TALDICE-1 age scale of the Talos Dome deep ice core, East Antarctica
Clim. Past, 7, 1-16, 2011, doi:10.5194/cp-7-1-2011
The dating of 55-112 ka BP (depth: 1239-1380 m) is described in the paper:
S. Schüpbach, U. Federer, M. Bigler, H. Fischer, T.F. Stocker
A refined TALDICE-1a age scale from 55 to 112 ka before present for the Talos Dome ice core based on
high-resolution methane measurements
Clim. Past, 2011

## Sheet: TALDICE-1a age scale
Buiron et al. 2011 and Schüpbach et al.2011, Climate of the Past	bag number	depth top (m)	ice age (yrs BP)	gas age (yrs BP)	ice age uncertainty (yr)	accumulation rate (cm ie/yr)	thinning rate
	1	0	-54	/	1.56404	8.23701	0.999849
Description of the combined Taldice-1 and -1a age scale	2	1	-50	/	3.12608	8.23617	0.999558
column 1: Bag numbers	3	2	-45	/	4.68661	8.23526	0.99925
column 2: depth top (m)	4	3	-41	/	6.2632	8.23443	0.998925
column 3: ice age (yrs before 1950)	5	4	-36	/	7.8627	8.23355	0.99858
column 4: gas age (yrs before 1950)	6	5	-31	/	9.49097	8.23279	0.998211
column 5: ice age uncertainty (yrs)	7	6	-26	/	11.153	8.23187	0.997832
column 6: accumulation rate calculated by Buiron et al. 2011 (cm ie/yr)	8	7	-21	/	12.8539	8.23111	0.997433
column 7: thinning rate calculated by Buiron et al. 2011	9	8	-16	/	14.5963	8.23018	0.997026
	10	9	-11	/	16.383	8.22939	0.996605
	11	10	-6	/	18.2188	8.22855	0.996171
	12	11	0	/	20.1004	8.2277	0.995728
	13	12	5	/	22.0271	8.22688	0.995269
	14	13	11	/	23.998	8.22594	0.994805
	15	14	17	/	26.0115	8.22514	0.994329
	16	15	23	/	28.0655	8.22414	0.993851
	17	16	29	/	30.1587	8.2197	0.993366
	18	17	36	/	32.5356	7.4333	0.992874
	19	18	43	/	34.9474	7.43255	0.992381
	20	19	50	/	37.3907	7.43159	0.991879
	21	20	58	/	39.8619	7.43077	0.991378
	22	21	65	/	42.3575	7.42984	0.990872
	23	22	73	/	44.8742	7.42908	0.990364
	24	23	80	/	47.4172	7.4281	0.989851
	25	24	88	/	49.9755	7.42731	0.989339
	26	25	96	/	52.5449	7.42637	0.988812
	27	26	104	/	55.4586	7.42545	0.98829
	28	27	113	/	58.3915	7.42451	0.987761
	29	28	122	/	61.3622	7.4273	0.987237
	30	29	132	/	64.2959	7.57756	0.986705
	31	30	141	/	67.2373	7.57662	0.986169
	32	31	150	/	70.1844	7.57567	0.985623
	33	32	159	/	73.1656	7.57472	0.985072
	34	33	169	/	76.1155	7.57377	0.984514
	35	34	178	/	79.1028	7.57281	0.983954
	36	35	188	/	82.1029	7.57187	0.983397
	37	36	197	/	85.1245	7.57091	0.982841
	38	37	207	/	88.1613	7.56994	0.982283
	39	38	217	/	91.1976	7.56895	0.981717
	40	39	226	/	94.2542	7.56232	0.98114
	41	40	236	/	97.3875	7.43195	0.980562
	42	41	247	/	100.503	7.43103	0.979973
	43	42	257	/	103.645	7.43011	0.979387
	44	43	267	/	106.802	7.42918	0.978791
	45	44	277	/	109.981	7.42821	0.978204
	46	45	288	/	113.151	7.42722	0.977603
	47	46	298	/	116.336	7.42622	0.977015
	48	47	309	/	119.535	7.42524	0.976414
	49	48	320	/	122.739	7.42427	0.975813
	50	49	330	/	125.975	7.40457	0.975211
	51	50	341	/	129.319	7.13386	0.974596
	52	51	353	/	132.659	7.13289	0.973981
	53	52	364	/	136.034	7.13194	0.973349
	54	53	375	/	139.417	7.13099	0.972722
	55	54	387	/	142.79	7.13006	0.972099
	56	55	399	/	146.178	7.12911	0.971469
	57	56	410	/	149.571	7.12813	0.970843
	58	57	422	/	152.988	7.12714	0.970206
	59	58	434	/	156.404	7.10091	0.96956
	60	59	446	/	159.963	6.8034	0.968906
	61	60	459	/	163.532	6.80249	0.968251
	62	61	471	/	167.117	6.80157	0.967608
	63	62	484	/	170.675	6.80063	0.966961
	64	63	497	/	174.272	6.79967	0.966312
	65	64	510	/	177.859	6.79872	0.965642
	66	65	523	/	181.45	6.79779	0.964961
	67	66	536	/	185.018	6.82119	0.96427
	68	67	549	/	188.404	7.17353	0.963576
	69	68	562	/	191.81	7.17261	0.962893
	70	69	574	/	195.22	7.17167	0.962205
	71	70	587	/	198.639	7.17077	0.961523
	72	71	624	13.9	202.042	7.16984	0.960836
	73	72	638	14.6	205.448	7.16896	0.960135
	74	73	651	14.7	208.848	7.16803	0.959421
	75	74	665	15.4	212.237	7.17457	0.958708
	76	75	678	16.3	215.534	7.34727	0.95799
	77	76	692	16.6	218.817	7.34634	0.957277
	78	77	705	16.9	222.079	7.34542	0.956557
	79	78	729	29	225.322	7.34453	0.955839
	80	79	742	38.2	228.548	7.34365	0.955113
	81	80	755	48.7	231.757	7.34276	0.954388
	82	81	763	57.9	234.944	7.34186	0.953652
	83	82	774	70.1	238.114	7.33722	0.952916
	84	83	787	80.8	241.318	7.21507	0.952177
	85	84	800	90.8	244.505	7.21413	0.951437
	86	85	808	99.3	247.671	7.21319	0.950695
	87	86	816	111	250.814	7.21221	0.949941
	88	87	835	127.1	253.938	7.21132	0.949185
	89	88	847	136.8	257.044	7.21042	0.94843
	90	89	858	147.4	260.129	7.20949	0.947679
	91	90	873	160	263.191	7.21506	0.946929
	92	91	880	170.8	266.197	7.29609	0.946166
	93	92	896	186.3	269.183	7.29512	0.945412
	94	93	912	198.7	272.151	7.29411	0.944643
	95	94	920	208.4	275.098	7.29307	0.94388
	96	95	938	222	278.028	7.29206	0.943097
	97	96	942	230.9	280.934	7.29107	0.942336
	98	97	961	248.4	283.82	7.29009	0.941562
	99	98	965	260.1	286.663	7.33657	0.940798
	100	99	989	279.6	289.349	7.72176	0.940041
	101	100	995	288.2	292.016	7.72069	0.939277
	102	101	1016	302.1	294.67	7.71964	0.938514
	103	102	1024	307.4	297.299	7.7186	0.937742
	104	103	1036	330.1	299.912	7.71756	0.936971
	105	104	1039	340.3	302.502	7.71652	0.936201
	106	105	1064	359.1	305.08	7.71455	0.935417
	107	106	1071	365.3	307.783	7.29879	0.934636
	108	107	1081	378.8	310.463	7.29769	0.933861
	109	108	1100	395.6	313.124	7.29661	0.933095
	110	109	1111	406.5	315.765	7.29549	0.932326
	111	110	1119	418.5	318.383	7.29435	0.931547
	112	111	1130	436.3	320.976	7.29325	0.930764
	113	112	1152	454.6	323.551	7.29217	0.929952
	114	113	1164	464.6	326.11	7.28271	0.929151
	115	114	1170	474.6	328.675	7.19519	0.928363
	116	115	1188	491.6	331.219	7.19402	0.927581
	117	116	1202	504.7	333.742	7.19288	0.926796
	118	117	1215	516.9	336.243	7.19177	0.926
	119	118	1225	529.2	338.722	7.19063	0.925202
	120	119	1237	543	341.177	7.18949	0.924391
	121	120	1252	558.5	343.606	7.19576	0.923587
	122	121	1271	573.7	345.984	7.29198	0.922786
	123	122	1282	583	348.341	7.2908	0.921988
	124	123	1289	594.2	350.673	7.28963	0.921193
	125	124	1302	612.4	352.982	7.28849	0.920397
	126	125	1327	629.9	355.272	7.28732	0.919593
	127	126	1329	636.6	357.538	7.28613	0.918776
	128	127	1345	654.4	359.779	7.29513	0.917961
	129	128	1363	669.9	361.929	7.53118	0.917147
	130	129	1374	680.3	364.059	7.53004	0.916334
	131	130	1386	694.3	366.167	7.5289	0.915529
	132	131	1401	708.5	368.255	7.52774	0.914724
	133	132	1411	721.5	370.321	7.52655	0.913921
	134	133	1425	737.3	372.365	7.52536	0.913106
	135	134	1439	751.2	374.388	7.52418	0.912282
	136	135	1460	765.4	376.409	7.4647	0.91146
	137	136	1463	771.5	378.533	7.01561	0.91064
	138	137	1484	789.2	380.633	7.01444	0.909833
	139	138	1494	800.4	382.708	7.01329	0.909016
	140	139	1511	815.6	384.759	7.01216	0.9082
	141	140	1519	827.9	386.784	7.01099	0.907384
	142	141	1539	845.2	388.784	7.01162	0.906558
	143	142	1553	857.6	390.579	7.73431	0.905741
	144	143	1558	869.1	392.351	7.73314	0.904915
	145	144	1578	886.9	394.103	7.73199	0.904101
	146	145	1590	896.6	395.831	7.73087	0.903275
	147	146	1609	919.7	397.542	7.72973	0.902466
	148	147	1612	924.4	399.232	7.72856	0.901635
	149	148	1630	940.1	400.902	7.72739	0.90081
	150	149	1642	950.6	402.56	7.68652	0.899982
	151	150	1662	964.3	404.322	7.14702	0.899153
	152	151	1666	972.7	406.056	7.14585	0.898331
	153	152	1684	990.7	407.766	7.14469	0.897508
	154	153	1698	1005.8	409.451	7.14356	0.896682
	155	154	1714	1021.1	411.112	7.14241	0.895865
	156	155	1723	1033.3	412.748	7.14123	0.895046
	157	156	1746	1049.4	414.36	7.14465	0.894225
	158	157	1755	1058.3	415.935	7.20344	0.893398
	159	158	1762	1070.3	417.484	7.20229	0.892563
	160	159	1782	1090.3	419.009	7.2011	0.891728
	161	160	1796	1104.2	420.51	7.19991	0.890899
	162	161	1819	1118	421.991	7.19872	0.890091
	163	162	1821	1123.9	423.445	7.19758	0.889275
	164	163	1837	1141.7	424.869	7.22591	0.888455
	165	164	1852	1157.5	426.21	7.54258	0.88763
	166	165	1869	1172.1	427.531	7.54137	0.886801
	167	166	1876	1182.5	428.829	7.54014	0.885975
	168	167	1884	1198.8	430.102	7.53892	0.885156
	169	168	1908	1219.6	431.354	7.53772	0.884345
	170	169	1916	1230	432.583	7.53652	0.883535
	171	170	1937	1246.6	433.79	7.53808	0.882724
	172	171	1947	1255.2	434.967	7.59484	0.881907
	173	172	1957	1267.5	436.122	7.59359	0.881085
	174	173	1973	1281.8	437.255	7.59232	0.88026
	175	174	1980	1294.2	438.364	7.59109	0.879439
	176	175	1997	1313	439.451	7.5899	0.878635
	177	176	2009	1328.9	440.515	7.58869	0.87783
	178	177	2032	1345.8	441.558	7.58927	0.877036
	179	178	2038	1354.1	442.567	7.67437	0.876227
	180	179	2056	1369.5	443.554	7.6731	0.875418
	181	180	2069	1381.7	444.521	7.67185	0.874601
	182	181	2077	1394.8	445.465	7.67061	0.873784
	183	182	2092	1412.5	446.386	7.66931	0.872973
	184	183	2113	1428.7	447.287	7.66796	0.872171
	185	184	2117	1436.3	448.165	7.66661	0.871377
	186	185	2138	1452.4	449.032	7.58357	0.870597
	187	186	2143	1459.6	449.946	6.98099	0.869804
	188	187	2158	1475.5	450.833	6.97968	0.868999
	189	188	2176	1491.5	451.695	6.97832	0.868185
	190	189	2193	1504.4	452.531	6.97691	0.867386
	191	190	2202	1516.1	453.341	6.97546	0.866589
	192	191	2223	1534.5	454.122	6.99508	0.865789
	193	192	2232	1547.4	454.833	7.44474	0.865005
	194	193	2254	1566.8	455.522	7.44332	0.864214
	195	194	2265	1578.5	456.187	7.44188	0.863425
	196	195	2283	1595	456.829	7.4404	0.862633
	197	196	2292	1606.9	457.448	7.43889	0.861852
	198	197	2308	1622.4	458.044	7.43734	0.86106
	199	198	2318	1633.3	458.617	7.43856	0.860271
	200	199	2332	1646.8	459.163	7.49473	0.859479
	201	200	2342	1658.5	459.686	7.49318	0.858684
	202	201	2358	1675.3	460.186	7.49159	0.857899
	203	202	2375	1691.2	460.663	7.48995	0.857125
	204	203	2387	1704.1	461.118	7.48829	0.856351
	205	204	2395	1719	461.55	7.48664	0.855583
	206	205	2420	1739.1	461.958	7.49965	0.854802
	207	206	2431	1748.8	462.33	7.82527	0.854012
	208	207	2436	1761.4	462.679	7.8236	0.853225
	209	208	2454	1781.9	463.008	7.82194	0.852444
	210	209	2478	1796.6	463.317	7.82024	0.851652
	211	210	2485	1800.9	463.605	7.81856	0.85086
	212	211	2490	1818.2	463.872	7.81686	0.850083
	213	212	2506	1837.5	464.117	7.8142	0.849293
	214	213	2528	1854	464.351	7.49111	0.848513
	215	214	2538	1863.6	464.562	7.48936	0.847735
	216	215	2558	1877.7	464.751	7.48762	0.846954
	217	216	2565	1885.6	464.918	7.48587	0.846156
	218	217	2580	1909	465.062	7.48406	0.845366
	219	218	2601	1924.3	465.184	7.48223	0.84456
	220	219	2608	1931.3	465.284	7.48499	0.843755
	221	220	2617	1944.5	465.36	7.7238	0.842957
	222	221	2638	1962.6	465.415	7.72203	0.842161
	223	222	2651	1974.2	465.449	7.72027	0.841365
	224	223	2662	1987.1	465.462	7.71846	0.840563
	225	224	2676	2004.2	465.455	7.71662	0.839758
	226	225	2693	2021.2	465.426	7.71475	0.838947
	227	226	2706	2035.1	465.377	7.71291	0.838117
	228	227	2725	2049.9	465.306	7.66286	0.837302
	229	228	2730	2061.9	465.21	7.33536	0.836485
	230	229	2764	2085.2	465.091	7.33348	0.835668
	231	230	2767	2089.3	464.949	7.3316	0.83484
	232	231	2780	2103.7	464.785	7.32975	0.83402
	233	232	2790	2118.8	464.598	7.32793	0.833202
	234	233	2811	2137.4	464.39	7.32339	0.832389
	235	234	2828	2148.9	464.156	7.27066	0.831559
	236	235	2831	2158.7	463.901	7.26876	0.830714
	237	236	2851	2180.3	463.624	7.26684	0.82988
	238	237	2868	2196.1	463.324	7.26494	0.829049
	239	238	2884	2210.9	463.003	7.26308	0.828222
	240	239	2896	2225.5	462.659	7.26124	0.827395
	241	240	2912	2242.6	462.293	7.25123	0.82656
	242	241	2932	2259.5	461.901	7.17047	0.825713
	243	242	2944	2271.5	461.486	7.16858	0.824876
	244	243	2963	2286.8	461.049	7.16669	0.82404
	245	244	2978	2298	460.59	7.1648	0.823204
	246	245	2988	2309.2	460.109	7.16291	0.822374
	247	246	3001	2325.7	459.607	7.16737	0.821535
	248	247	3015	2343	459.104	7.44704	0.820689
	249	248	3042	2361	458.581	7.44521	0.819842
	250	249	3044	2367.5	458.038	7.44338	0.81901
	251	250	3063	2385.9	457.475	7.44153	0.818176
	252	251	3083	2402.4	456.891	7.43969	0.817345
	253	252	3091	2414.5	456.289	7.43784	0.816513
	254	253	3112	2432.5	455.665	7.41429	0.815677
	255	254	3128	2445.3	454.99	7.09162	0.81485
	256	255	3140	2457.3	454.295	7.08976	0.814022
	257	256	3158	2473.8	453.579	7.08792	0.813192
	258	257	3177	2486.7	452.842	7.08608	0.812378
	259	258	3183	2497.7	452.086	7.08425	0.811568
	260	259	3208	2516.5	451.309	7.0842	0.810746
	261	260	3218	2526	450.562	7.55147	0.809928
	262	261	3228	2539.1	449.798	7.54959	0.809124
	263	262	3243	2558.6	449.018	7.54772	0.808312
	264	263	3264	2576.4	448.218	7.54585	0.807511
	265	264	3277	2589.3	447.402	7.544	0.806706
	266	265	3291	2604.5	446.568	7.54215	0.805916
	267	266	3308	2620.3	445.714	7.52318	0.805125
	268	267	3325	2632.8	444.796	7.14845	0.804354
	269	268	3334	2644.8	443.861	7.14657	0.80358
	270	269	3362	2663.2	442.906	7.14467	0.802807
	271	270	3365	2669.3	441.934	7.14276	0.802027
	272	271	3383	2688.5	440.945	7.14082	0.801243
	273	272	3398	2706.1	439.939	7.1389	0.800483
	274	273	3420	2723.8	438.916	7.14598	0.799724
	275	274	3432	2736.1	437.886	7.20965	0.798973
	276	275	3444	2750.5	436.84	7.20768	0.798224
	277	276	3466	2768.8	435.777	7.2057	0.797476
	278	277	3475	2780.9	434.699	7.20371	0.796722
	279	278	3492	2798.2	433.605	7.20173	0.795963
	280	279	3508	2813.4	432.497	7.21678	0.79522
	281	280	3515	2826.7	431.407	7.41757	0.794485
	282	281	3545	2848.1	430.301	7.4155	0.793757
	283	282	3546	2854.7	429.181	7.41342	0.793008
	284	283	3567	2875.7	428.048	7.41135	0.792261
	285	284	3588	2890.7	426.898	7.4093	0.791517
	286	285	3596	2901.3	425.737	7.40721	0.79077
	287	286	3611	2920.3	424.553	7.34684	0.790034
	288	287	3631	2938.5	423.291	6.97829	0.789275
	289	288	3646	2951.9	422.016	6.97606	0.788528
	290	289	3661	2965.1	420.726	6.97383	0.787784
	291	290	3679	2980.8	419.424	6.9716	0.787045
	292	291	3694	2995.3	418.109	6.96933	0.786303
	293	292	3710	3012.1	416.785	6.98135	0.785566
	294	293	3721	3028.2	415.471	7.08547	0.784814
	295	294	3749	3049.4	414.143	7.08323	0.784044
	296	295	3760	3060.2	412.804	7.08098	0.783286
	297	296	3778	3074.6	411.454	7.0787	0.782527
	298	297	3789	3088.8	410.093	7.07644	0.78179
	299	298	3808	3106	408.728	7.109	0.781045
	300	299	3818	3119.5	407.418	7.44673	0.780293
	301	300	3834	3139.2	406.099	7.44454	0.779519
	302	301	3854	3157.7	404.769	7.44238	0.778754
	303	302	3870	3170.5	403.428	7.44021	0.777992
	304	303	3881	3183.5	402.08	7.43803	0.777218
	305	304	3897	3201.9	400.723	7.43588	0.776453
	306	305	3918	3220.7	399.357	7.43734	0.775706
	307	306	3926	3232.9	397.985	7.43527	0.774932
	308	307	3950	3254.5	396.604	7.43319	0.774157
	309	308	3962	3268.2	395.215	7.43111	0.773383
	310	309	3984	3284.8	393.817	7.42901	0.772608
	311	310	3993	3295.4	392.412	7.42693	0.771837
	312	311	4014	3311	390.993	7.40267	0.77106
	313	312	4030	3321.1	389.534	7.21138	0.77026
	314	313	4042	3345.3	388.066	7.20947	0.769471
	315	314	4052	3358.2	386.594	7.20756	0.768684
	316	315	4069	3376.2	385.117	7.20561	0.767895
	317	316	4090	3394.5	383.633	7.20369	0.767094
	318	317	4106	3407.5	382.136	7.16449	0.766299
	319	318	4125	3421.6	380.538	6.74102	0.765495
	320	319	4138	3434	378.938	6.73916	0.764688
	321	320	4150	3451.4	377.338	6.73736	0.763893
	322	321	4174	3473.2	375.735	6.7356	0.763089
	323	322	4195	3490	374.131	6.73384	0.762288
	324	323	4213	3504.8	372.541	6.80384	0.761473
	325	324	4225	3519.1	371.088	7.43656	0.760663
	326	325	4239	3537.6	369.634	7.43485	0.759853
	327	326	4260	3557.6	368.178	7.43316	0.759042
	328	327	4272	3572	366.722	7.43148	0.758231
	329	328	4288	3591	365.266	7.42979	0.757439
	330	329	4308	3608.7	363.802	7.39358	0.756637
	331	330	4324	3621.7	362.217	6.83613	0.755831
	332	331	4341	3636.1	360.636	6.83436	0.755037
	333	332	4353	3650.1	359.059	6.8325	0.754237
	334	333	4373	3668.4	357.486	6.83059	0.753443
	335	334	4389	3684.9	355.921	6.82863	0.752644
	336	335	4412	3703.5	354.367	6.85141	0.751834
	337	336	4420	3715.7	352.881	7.11716	0.751058
	338	337	4441	3736.8	351.404	7.11509	0.750265
	339	338	4458	3752.5	349.934	7.11304	0.749479
	340	339	4470	3767.3	348.476	7.1109	0.748686
	341	340	4493	3787.2	347.028	7.1088	0.747887
	342	341	4512	3801.6	345.594	7.12442	0.747074
	343	342	4521	3814.8	344.217	7.33581	0.746271
	344	343	4545	3836.8	342.853	7.33378	0.745479
	345	344	4554	3849.9	341.504	7.33173	0.744694
	346	345	4581	3870.5	340.168	7.32965	0.74392
	347	346	4589	3879.3	338.849	7.32763	0.743115
	348	347	4607	3897.9	337.545	7.30097	0.742294
	349	348	4631	3917.4	336.179	6.87192	0.741459
	350	349	4644	3931.2	334.838	6.86989	0.740649
	351	350	4662	3950.7	333.525	6.86789	0.739832
	352	351	4686	3969.3	332.237	6.8659	0.739005
	353	352	4698	3981.2	330.979	6.86389	0.738186
	354	353	4717	3998.3	329.751	6.86098	0.73737
	355	354	4734	4013.3	328.555	6.85817	0.736538
	356	355	4751	4029.8	327.393	6.85623	0.7357
	357	356	4765	4048.5	326.269	6.85429	0.734853
	358	357	4785	4071.1	325.183	6.85233	0.734043
	359	358	4802	4090.5	324.137	6.85041	0.733215
	360	359	4825	4107	323.131	6.85463	0.732364
	361	360	4837	4118.6	322.174	6.89565	0.731521
	362	361	4852	4134.2	321.26	6.89371	0.730683
	363	362	4870	4152.9	320.392	6.89179	0.729838
	364	363	4886	4170.9	319.572	6.88993	0.728988
	365	364	4913	4191.7	318.799	6.89418	0.728143
	366	365	4923	4204.2	318.125	7.38561	0.727291
	367	366	4944	4225.1	317.494	7.38368	0.726438
	368	367	4955	4241.5	316.91	7.38176	0.725574
	369	368	4978	4264.5	316.373	7.37993	0.724716
	370	369	5002	4282	315.883	7.37811	0.723872
	371	370	5007	4292.2	315.443	7.37626	0.723039
	372	371	5026	4312.4	315.048	7.2581	0.722246
	373	372	5052	4329.5	314.675	6.59153	0.721454
	374	373	5063	4339.7	314.369	6.58975	0.720653
	375	374	5078	4356.1	314.132	6.588	0.719857
	376	375	5096	4376.3	313.966	6.58628	0.719062
	377	376	5121	4398.1	313.871	6.58986	0.718281
	378	377	5136	4413.2	313.849	6.63105	0.717494
	379	378	5158	4432.3	313.899	6.62944	0.716715
	380	379	5178	4448.8	314.023	6.62778	0.715931
	381	380	5200	4464.4	314.222	6.62616	0.715153
	382	381	5209	4476.9	314.494	6.61588	0.71437
	383	382	5237	4500.8	314.87	6.09617	0.713571
	384	383	5261	4517.7	315.328	6.09479	0.712787
	385	384	5278	4532	315.866	6.09349	0.712026
	386	385	5296	4550.4	316.48	6.09221	0.711261
	387	386	5324	4571.9	317.165	6.10667	0.710519
	388	387	5334	4586.2	317.833	6.86462	0.709763
	389	388	5355	4607.5	318.554	6.86352	0.709016
	390	389	5372	4625.7	319.323	6.86248	0.708271
	391	390	5392	4645	320.14	6.86147	0.707539
	392	391	5407	4663.3	321.002	6.86054	0.706808
	393	392	5434	4684.7	321.908	6.85178	0.706078
	394	393	5443	4696.4	322.866	6.77172	0.705358
	395	394	5465	4716	323.862	6.77093	0.704632
	396	395	5479	4731.3	324.894	6.77018	0.703922
	397	396	5504	4752.2	325.961	6.76951	0.703226
	398	397	5514	4766.5	327.059	6.76275	0.702549
	399	398	5542	4789.5	328.284	6.22084	0.701851
	400	399	5563	4805.7	329.544	6.22025	0.701137
	401	400	5584	4821	330.834	6.21976	0.700428
	402	401	5601	4836.1	332.15	6.2194	0.699736
	403	402	5622	4854.5	333.489	6.22604	0.699031
	404	403	5639	4872.2	334.707	6.94252	0.698314
	405	404	5653	4893.1	335.936	6.9423	0.697629
	406	405	5685	4917.5	337.177	6.94212	0.696973
	407	406	5696	4931.1	338.425	6.94199	0.69627
	408	407	5716	4951.8	339.678	6.94191	0.695558
	409	408	5739	4973.5	340.947	6.88353	0.694849
	410	409	5763	4991.4	342.329	6.33813	0.694154
	411	410	5781	5006	343.715	6.33822	0.693457
	412	411	5791	5021.2	345.1	6.33836	0.692756
	413	412	5820	5043.6	346.485	6.33853	0.692044
	414	413	5834	5057.2	347.862	6.35439	0.69131
	415	414	5851	5077.8	349.199	6.51388	0.690566
	416	415	5879	5101.5	350.529	6.51421	0.689823
	417	416	5892	5119.4	351.847	6.51456	0.689095
	418	417	5923	5146	353.154	6.51501	0.688381
	419	418	5935	5161.6	354.443	6.53207	0.687659
	420	419	5954	5183.9	355.67	6.77798	0.686908
	421	420	5971	5205	356.879	6.77858	0.686142
	422	421	5993	5225.6	358.071	6.77921	0.685184
	423	422	6011	5242.5	359.243	6.7799	0.684232
	424	423	6029	5260.1	360.395	6.78067	0.683263
	425	424	6043	5280.2	361.533	6.72143	0.682286
	426	425	6078	5308	362.701	6.41589	0.681295
	427	426	6089	5322.8	363.841	6.41686	0.680312
	428	427	6123	5350.3	364.956	6.41788	0.679306
	429	428	6138	5366.3	366.041	6.41899	0.678323
	430	429	6165	5389.8	367.093	6.45149	0.677321
	431	430	6180	5407.8	368.087	6.61648	0.676308
	432	431	6206	5430.7	369.051	6.61782	0.675304
	433	432	6219	5449.1	369.981	6.61917	0.674309
	434	433	6246	5474.3	370.879	6.62055	0.673311
	435	434	6266	5493.7	371.739	6.65612	0.672286
	436	435	6277	5513.8	372.539	6.86451	0.671255
	437	436	6311	5541.5	373.306	6.86621	0.670217
	438	437	6324	5554.8	374.039	6.868	0.669171
	439	438	6347	5574	374.737	6.86988	0.668143
	440	439	6357	5590.1	375.401	6.83952	0.667107
	441	440	6385	5615.9	376.053	6.58125	0.666067
	442	441	6403	5637.9	376.665	6.58334	0.665037
	443	442	6437	5663.5	377.239	6.58553	0.664024
	444	443	6445	5677.1	377.772	6.58783	0.662996
	445	444	6467	5703.7	378.264	6.58847	0.661972
	446	445	6496	5729.8	378.716	6.58215	0.660942
	447	446	6519	5747.4	379.126	6.58468	0.659891
	448	447	6530	5762.1	379.493	6.58739	0.658848
	449	448	6558	5786.8	379.818	6.5901	0.657829
	450	449	6574	5805.9	380.098	6.62615	0.656841
	451	450	6589	5828.8	380.324	6.91393	0.655839
	452	451	6621	5856.9	380.508	6.91698	0.654828
	453	452	6637	5873.3	380.649	6.92008	0.653857
	454	453	6655	5893.6	380.746	6.92323	0.652891
	455	454	6675	5916.4	380.798	6.92035	0.651887
	456	455	6698	5938.7	380.805	6.85253	0.650898
	457	456	6722	5960.2	380.767	6.85596	0.649947
	458	457	6740	5980	380.683	6.85949	0.649032
	459	458	6766	6004	380.551	6.86311	0.648104
	460	459	6780	6022.7	380.372	6.82458	0.647167
	461	460	6808	6047.3	380.118	6.18899	0.646223
	462	461	6835	6066.2	379.812	6.19297	0.645262
	463	462	6845	6080.4	379.452	6.19703	0.644319
	464	463	6873	6105.9	379.04	6.20119	0.643415
	465	464	6891	6127.2	378.576	6.23198	0.642513
	466	465	6915	6152.7	378.074	6.40421	0.641601
	467	466	6947	6176.3	377.517	6.40859	0.640698
	468	467	6965	6190.5	376.907	6.41314	0.639777
	469	468	6978	6209.2	376.244	6.41789	0.638876
	470	469	7006	6235.1	375.523	6.38898	0.637807
	471	470	7032	6257.3	374.727	6.23866	0.636755
	472	471	7057	6278.1	373.876	6.24364	0.635735
	473	472	7081	6298.7	372.967	6.24871	0.634701
	474	473	7103	6320.3	372.005	6.26892	0.633598
	475	474	7123	6343.2	371.008	6.40672	0.632409
	476	475	7146	6367.3	369.957	6.41207	0.631219
	477	476	7174	6391.2	368.851	6.41754	0.630023
	478	477	7194	6409.6	367.691	6.42311	0.628855
	479	478	7217	6430	366.479	6.44219	0.627672
	480	479	7233	6450.4	365.232	6.51855	0.626487
	481	480	7265	6479.1	363.933	6.52433	0.625328
	482	481	7289	6498.2	362.584	6.53022	0.624195
	483	482	7306	6517.3	361.187	6.53626	0.623037
	484	483	7329	6541.7	359.743	6.54158	0.62188
	485	484	7358	6565.3	358.251	6.54779	0.620744
	486	485	7371	6582.9	356.718	6.55406	0.619587
	487	486	7403	6610.8	355.14	6.56036	0.618463
	488	487	7428	6630.1	353.521	6.57751	0.617344
	489	488	7441	6647.3	351.881	6.65051	0.616213
	490	489	7473	6673.4	350.201	6.65686	0.615097
	491	490	7483	6691.4	348.489	6.66327	0.613998
	492	491	7518	6722.8	346.74	6.66515	0.612918
	493	492	7544	6742.8	344.916	6.52232	0.611827
	494	493	7560	6761	343.063	6.52874	0.610768
	495	494	7587	6786.9	341.183	6.53523	0.609699
	496	495	7608	6810.2	339.279	6.54173	0.608636
	497	496	7628	6835.2	337.354	6.541	0.607576
	498	497	7658	6861.9	335.396	6.50387	0.606515
	499	498	7678	6881.8	333.423	6.51037	0.605454
	500	499	7701	6906	331.44	6.51691	0.604394
	501	500	7726	6932	329.444	6.5043	0.603364
	502	501	7753	6956	327.364	6.25807	0.602341
	503	502	7773	6977.5	325.288	6.26478	0.601291
	504	503	7800	7002.4	323.222	6.27157	0.600254
	505	504	7827	7025.5	321.17	6.28307	0.599113
	506	505	7844	7047.8	319.18	6.41565	0.597971
	507	506	7871	7076.9	317.214	6.42274	0.59682
	508	507	7898	7100.8	315.276	6.42998	0.595691
	509	508	7919	7121.6	313.374	6.43734	0.594577
	510	509	7943	7146.5	311.514	6.43931	0.593444
	511	510	7974	7172.5	309.692	6.4202	0.592328
	512	511	7988	7192.4	307.929	6.42787	0.591249
	513	512	8023	7221.3	306.227	6.43574	0.59015
	514	513	8035	7240.4	304.605	6.47433	0.589064
	515	514	8069	7270.4	303.094	6.64645	0.588024
	516	515	8086	7291	301.663	6.65473	0.587
	517	516	8118	7317.3	300.315	6.66321	0.58597
	518	517	8135	7335.6	299.049	6.61423	0.584962
	519	518	8165	7360.8	297.807	6.20224	0.583933
	520	519	8188	7382.3	296.689	6.21119	0.582918
	521	520	8211	7406.4	295.703	6.22029	0.581878
	522	521	8239	7432.3	294.865	6.28938	0.580899
	523	522	8263	7454.8	294.208	6.69858	0.579952
	524	523	8280	7476.7	293.684	6.7082	0.579001
	525	524	8308	7504.3	293.294	6.71787	0.578034
	526	525	8334	7528.4	293.035	6.73036	0.577085
	527	526	8354	7550.3	292.905	6.77022	0.576134
	528	527	8378	7575.4	292.902	6.77989	0.575109
	529	528	8405	7599.3	293.021	6.78962	0.574129
	530	529	8421	7620.3	293.259	6.79651	0.573133
	531	530	8450	7649.1	293.616	6.7722	0.572129
	532	531	8469	7672.3	294.087	6.78207	0.571061
	533	532	8502	7699.4	294.668	6.79191	0.570014
	534	533	8517	7718.7	295.355	6.80269	0.568961
	535	534	8545	7746.8	296.141	6.83156	0.567891
	536	535	8566	7771.2	297.023	6.8414	0.566825
	537	536	8590	7797.7	297.997	6.85125	0.56573
	538	537	8608	7822.4	299.057	6.86309	0.564616
	539	538	8640	7853.1	300.174	7.0225	0.563511
	540	539	8661	7875.7	301.364	7.03237	0.562392
	541	540	8683	7901.9	302.623	7.04224	0.561259
	542	541	8709	7928.2	303.946	7.05218	0.56009
	543	542	8738	7952.7	305.333	7.04966	0.558938
	544	543	8750	7972.6	306.786	7.00369	0.557758
	545	544	8774	8003	308.289	7.01374	0.556561
	546	545	8806	8032.5	309.84	7.02378	0.55536
	547	546	8832	8055.5	311.435	7.03193	0.554154
	548	547	8851	8079.4	313.071	7.03238	0.552948
	549	548	8878	8108	314.74	7.04254	0.551729
	550	549	8903	8135.3	316.44	7.05265	0.550515
	551	550	8921	8161.3	318.154	7.10087	0.54929
	552	551	8950	8192	319.843	7.30149	0.548062
	553	552	8975	8216.2	321.547	7.3117	0.546863
	554	553	8988	8236.5	323.261	7.32193	0.545646
	555	554	9019	8266.4	324.98	7.33909	0.544933
	556	555	9041	8287.2	326.691	7.39065	0.544251
	557	556	9055	8308.8	328.399	7.40085	0.543534
	558	557	9083	8337.9	330.102	7.4112	0.542779
	559	558	9106	8361.4	331.802	7.40582	0.542019
	560	559	9124	8383.1	333.515	7.3086	0.541283
	561	560	9153	8408.7	335.217	7.31899	0.540505
	562	561	9170	8429	336.903	7.3294	0.539717
	563	562	9194	8455	338.562	7.37746	0.538988
	564	563	9213	8479.8	340.143	7.64999	0.538229
	565	564	9239	8506.3	341.699	7.66043	0.537464
	566	565	9255	8527.7	343.227	7.67081	0.536691
	567	566	9278	8552.6	344.723	7.69323	0.535936
	568	567	9300	8575.8	346.166	7.81548	0.53515
	569	568	9319	8598	347.574	7.82591	0.53441
	570	569	9347	8623.7	348.946	7.83635	0.533675
	571	570	9357	8643.8	350.277	7.85071	0.532961
	572	571	9385	8675	351.556	7.92529	0.532189
	573	572	9410	8699.7	352.794	7.93568	0.531432
	574	573	9429	8719.7	353.989	7.94608	0.530658
	575	574	9446	8741.8	355.139	7.9534	0.529895
	576	575	9477	8768.2	356.307	7.54209	0.529092
	577	576	9491	8788.1	357.427	7.55232	0.528314
	578	577	9521	8815.1	358.503	7.56263	0.527569
	579	578	9530	8834.7	359.528	7.57689	0.52678
	580	579	9564	8865.4	360.488	7.72501	0.526058
	581	580	9582	8884.8	361.399	7.7352	0.525291
	582	581	9604	8908.6	362.26	7.74521	0.524558
	583	582	9631	8932.2	363.07	7.75524	0.523778
	584	583	9644	8952.4	363.829	7.75922	0.523024
	585	584	9674	8981	364.535	7.76911	0.52228
	586	585	9693	9000.9	365.189	7.77894	0.521549
	587	586	9711	9022.9	365.786	7.79164	0.520781
	588	587	9741	9050.1	366.326	7.85048	0.520031
	589	588	9756	9069.9	366.808	7.86015	0.519272
	590	589	9782	9096.2	367.233	7.86968	0.518515
	591	590	9807	9118	367.601	7.85022	0.517751
	592	591	9822	9136.4	367.922	7.53006	0.516996
	593	592	9851	9162.7	368.183	7.53944	0.51624
	594	593	9871	9181.9	368.382	7.54866	0.515504
	595	594	9892	9204.8	368.516	7.61468	0.514797
	596	595	9912	9228.5	368.583	7.99	0.51406
	597	596	9942	9254.3	368.586	7.99903	0.513361
	598	597	9959	9271.3	368.522	8.00807	0.512635
	599	598	9979	9292.8	368.393	8.01176	0.511905
	600	599	10005	9315.5	368.194	7.99564	0.511171
	601	600	10019	9335.3	367.928	8.0045	0.51045
	602	601	10052	9364.2	367.591	8.01318	0.509707
	603	602	10071	9383.8	367.181	7.96235	0.508923
	604	603	10098	9407.2	366.681	7.70787	0.508156
	605	604	10115	9425.8	366.107	7.71641	0.507231
	606	605	10135	9450.4	365.459	7.72368	0.506287
	607	606	10166	9476.9	364.732	7.71201	0.505386
	608	607	10184	9495.5	363.927	7.72028	0.504526
	609	608	10212	9520.1	363.042	7.72846	0.503607
	610	609	10229	9540.4	362.08	7.745	0.502667
	611	610	10254	9566.9	361.047	7.815	0.50178
	612	611	10281	9590.4	359.932	7.82279	0.500854
	613	612	10302	9610.3	358.736	7.83057	0.499881
	614	613	10322	9633.1	357.461	7.8447	0.498952
	615	614	10348	9658.3	356.108	7.87862	0.497985
	616	615	10369	9680.2	354.673	7.88613	0.497007
	617	616	10395	9704.6	353.155	7.89365	0.495969
	618	617	10419	9728	351.556	7.90844	0.494959
	619	618	10438	9749.1	349.875	7.91556	0.493883
	620	619	10464	9774.7	348.11	7.92257	0.492783
	621	620	10489	9797.4	346.257	7.90917	0.49169
	622	621	10508	9817.7	344.296	7.80969	0.490607
	623	622	10530	9841.5	342.255	7.81626	0.489469
	624	623	10556	9867.3	340.138	7.83117	0.488365
	625	624	10579	9889.5	338.036	8.18165	0.487297
	626	625	10601	9912.2	335.86	8.18782	0.486234
	627	626	10624	9936.1	333.611	8.19384	0.48511
	628	627	10647	9960.1	331.295	8.21128	0.484041
	629	628	10666	9984	328.94	8.30667	0.482989
	630	629	10697	10011.5	326.518	8.31222	0.481878
	631	630	10716	10030.2	324.035	8.31764	0.480843
	632	631	10742	10053.7	321.434	8.13863	0.47976
	633	632	10765	10075.1	318.509	7.38934	0.478675
	634	633	10789	10097.7	315.539	7.39438	0.477542
	635	634	10809	10122.7	312.575	7.50006	0.476425
	636	635	10839	10151	309.8	8.10922	0.475627
	637	636	10859	10173.6	306.996	8.11361	0.474918
	638	637	10885	10198.6	304.166	8.11805	0.474164
	639	638	10902	10219.1	301.317	8.11487	0.473434
	640	639	10930	10245.6	298.446	8.09097	0.472684
	641	640	10952	10268	295.571	8.0949	0.471951
	642	641	10976	10291.3	292.692	8.08373	0.471262
	643	642	11001	10312.9	289.79	7.99591	0.470554
	644	643	11017	10333.9	286.914	7.99947	0.469806
	645	644	11042	10361.9	284.073	8.01376	0.469079
	646	645	11069	10388.2	281.38	8.34605	0.468452
	647	646	11091	10409.4	278.726	8.34901	0.467393
	648	647	11110	10431.4	276.122	8.35192	0.466415
	649	648	11138	10457	273.553	8.2768	0.465469
	650	649	11158	10477.8	270.93	7.87156	0.464516
	651	650	11186	10503	268.401	7.87363	0.463509
	652	651	11208	10524.9	265.986	7.89712	0.462518
	653	652	11228	10548	263.751	8.11604	0.461601
	654	653	11255	10574.4	261.639	8.11719	0.460675
	655	654	11283	10599.5	259.659	8.11815	0.459725
	656	655	11308	10622.1	257.8	8.00972	0.458748
	657	656	11336	10647.7	256.022	7.63154	0.457763
	658	657	11359	10670.7	254.437	7.63152	0.456724
	659	658	11380	10694	253.075	7.74832	0.455803
	660	659	11402	10719.5	251.983	8.24839	0.454934
	661	660	11431	10745.9	251.076	8.24848	0.45409
	662	661	11448	10768.9	250.363	8.26266	0.453337
	663	662	11480	10797.6	249.853	8.37843	0.452607
	664	663	11498	10817.6	249.541	8.37866	0.451856
	665	664	11522	10843.6	249.429	8.37908	0.451215
	666	665	11548	10869.4	249.522	8.34586	0.450607
	667	666	11574	10893.7	249.829	8.22831	0.450086
	668	667	11592	10914.2	250.353	8.22899	0.449558
	669	668	11619	10938.6	251.093	8.25138	0.449107
	670	669	11638	10959.9	252.037	8.35821	0.448687
	671	670	11663	10985.9	253.194	8.35898	0.448274
	672	671	11685	11011.3	254.546	8.34965	0.447948
	673	672	11722	11038.8	256.099	8.25466	0.447578
	674	673	11732	11055.7	257.814	8.25467	0.4472
	675	674	11761	11084.6	259.693	8.25455	0.4468
	676	675	11786	11107.1	261.727	8.22168	0.446349
	677	676	11805	11129.6	263.915	8.11278	0.446013
	678	677	11838	11158	266.22	8.11175	0.445567
	679	678	11853	11178.4	268.601	8.15373	0.445161
	680	679	11881	11209	271.004	8.32733	0.4447
	681	680	11909	11233.9	273.465	8.3252	0.4441
	682	681	11927	11253.4	275.997	8.22662	0.443546
	683	682	11950	11276.2	278.727	7.71018	0.443014
	684	683	11979	11301.6	281.479	7.70697	0.442503
	685	684	12001	11323.7	284.255	7.64179	0.441939
	686	685	12033	11349.6	287.149	7.329	0.440246
	687	686	12060	11374.9	290.03	7.32474	0.43847
	688	687	12091	11403.6	292.847	7.41384	0.43686
	689	688	12120	11430.2	295.483	7.80889	0.435287
	690	689	12146	11457.8	298.067	7.80363	0.433791
	691	690	12185	11487.7	300.628	7.70563	0.432369
	692	691	12208	11507.5	303.253	7.3222	0.430979
	693	692	12241	11535.4	305.806	7.31641	0.429558
	694	693	12265	11560.2	308.274	7.32966	0.428181
	695	694	12303	11591.1	310.641	7.38668	0.426837
	696	695	12330	11615.3	312.925	7.38015	0.425408
	697	696	12365	11642.6	315.159	7.2458	0.425199
	698	697	12391	11663.2	317.413	6.88098	0.424875
	699	698	12421	11686.2	319.598	6.81066	0.424583
	700	699	12451	11708	321.827	6.40341	0.424271
	701	700	12484	11730.7	323.974	6.39541	0.42398
	702	701	12509	11752	326.013	6.47588	0.423729
	703	702	12544	11778.5	327.907	6.72649	0.423433
	704	703	12570	11801.4	329.747	6.68211	0.423142
	705	704	12609	11829	331.609	6.41492	0.422883
	706	705	12638	11849.2	333.43	6.40659	0.422657
	707	706	12669	11873	335.23	6.36982	0.422388
	708	707	12702	11897.9	337.038	6.28017	0.422098
	709	708	12735	11922.9	338.846	6.26251	0.421774
	710	709	12766	11946	340.68	6.20668	0.421432
	711	710	12793	11969.3	342.536	6.19748	0.421015
	712	711	12830	11997.5	344.473	6.04615	0.42055
	713	712	12866	12023.9	346.465	6.03795	0.420095
	714	713	12900	12049.8	348.494	6.06561	0.419733
	715	714	12933	12078.1	350.526	6.16027	0.419197
	716	715	12970	12106.3	352.601	6.10313	0.418697
	717	716	13004	12130.9	354.777	5.86754	0.418259
	718	717	13039	12156	356.961	5.87332	0.417751
	719	718	13072	12183.5	359.081	6.03038	0.417159
	720	719	13108	12215	361.177	6.02283	0.416619
	721	720	13148	12247	363.22	6.05594	0.41607
	722	721	13182	12275.1	365.172	6.15669	0.415376
	723	722	13213	12304.1	367.056	6.13182	0.414801
	724	723	13251	12333.6	368.875	6.0595	0.414102
	725	724	13273	12358.1	370.588	6.05048	0.413329
	726	725	13311	12392.6	372.186	6.02716	0.412693
	727	726	13351	12425.3	373.651	6.02045	0.411872
	728	727	13379	12454.3	374.971	5.98186	0.41118
	729	728	13426	12492.7	376.144	5.89829	0.410327
	730	729	13455	12520.5	377.14	5.87336	0.409504
	731	730	13495	12555	377.951	5.81255	0.408742
	732	731	13529	12588	378.55	5.86287	0.407871
	733	732	13563	12623.9	378.92	6.07504	0.406994
	734	733	13606	12661.6	379.07	6.05625	0.406085
	735	734	13635	12693.2	378.991	5.94221	0.405152
	736	735	13678	12732.9	378.675	5.93555	0.404817
	737	736	13715	12764.9	378.114	5.89003	0.404526
	738	737	13744	12797.3	377.298	5.79538	0.404104
	739	738	13786	12838.4	376.249	5.85155	0.403583
	740	739	13824	12875.1	374.995	6.02076	0.402866
	741	740	13857	12909.6	373.501	5.97996	0.402112
	742	741	13900	12948.5	371.744	5.8528	0.401279
	743	742	13931	12982	369.766	5.83453	0.400377
	744	743	13976	13024.2	367.556	5.76423	0.399442
	745	744	14017	13061.5	365.161	5.77197	0.398387
	746	745	14053	13099.8	362.685	5.97058	0.397407
	747	746	14094	13140.9	360.062	5.96297	0.395941
	748	747	14137	13181.4	357.339	6.00673	0.394505
	749	748	14173	13220.9	354.582	6.12879	0.392944
	750	749	14218	13264.3	351.735	6.06465	0.391375
	751	750	14257	13302.6	348.777	5.87918	0.389825
	752	751	14298	13342.5	345.855	5.90512	0.388195
	753	752	14334	13382.3	343.068	6.04511	0.386513
	754	753	14376	13426.1	340.4	6.0638	0.384844
	755	754	14414	13468.1	338.029	6.4297	0.383211
	756	755	14455	13513.4	335.84	6.4209	0.381615
	757	756	14492	13557	333.911	6.50374	0.380029
	758	757	14533	13603.4	332.321	6.78396	0.378534
	759	758	14572	13644.1	331.023	6.73985	0.377033
	760	759	14608	13683.3	330.037	6.40602	0.375572
	761	760	14643	13723.9	329.493	6.39617	0.374158
	762	761	14681	13768.2	329.44	6.4852	0.372774
	763	762	14722	13813.6	329.872	6.76368	0.371433
	764	763	14751	13854.1	330.776	6.74686	0.370067
	765	764	14799	13902.4	332.162	6.69467	0.368874
	766	765	14828	13938.5	334.019	6.68532	0.367737
	767	766	14866	13982	336.342	6.64562	0.366615
	768	767	14904	14025.1	339.138	6.54798	0.365657
	769	768	14940	14065.8	342.385	6.47347	0.364896
	770	769	14979	14108.2	346.218	6.15103	0.364197
	771	770	15030	14150.6	350.462	6.1278	0.363611
	772	771	15061	14182	355.296	5.83503	0.362675
	773	772	15097	14222.1	360.476	5.82674	0.361597
	774	773	15140	14265.3	365.921	5.85442	0.360652
	775	774	15185	14304.4	371.534	5.92983	0.359831
	776	775	15218	14339.8	377.364	5.89433	0.358865
	777	776	15269	14383	383.424	5.81446	0.358081
	778	777	15303	14414.7	389.617	5.78685	0.357205
	779	778	15354	14455.4	395.957	5.71567	0.356511
	780	779	15392	14490.8	402.238	5.7902	0.355707
	781	780	15435	14530.5	408.16	6.13136	0.354931
	782	781	15474	14565.5	414.067	6.10118	0.354229
	783	782	15515	14600	420.224	5.78717	0.353539
	784	783	15560	14636.8	426.304	5.77937	0.352842
	785	784	15603	14671.5	432.425	5.63989	0.35218
	786	785	15654	14708.9	438.754	5.3595	0.350663
	787	786	15700	14747.1	444.957	5.35944	0.349012
	788	787	15755	14791.8	451.015	5.3663	0.347428
	789	788	15804	14833.4	456.882	5.40109	0.345897
	790	789	15858	14879.5	462.504	5.48276	0.344391
	791	790	15909	14922.9	467.984	5.46112	0.342927
	792	791	15959	14967.6	473.334	5.4216	0.341503
	793	792	16008	15012.2	478.539	5.39751	0.340124
	794	793	16057	15056.4	483.622	5.35313	0.338717
	795	794	16107	15101.7	488.504	5.39692	0.3374
	796	795	16157	15149.6	493.131	5.50155	0.336653
	797	796	16212	15197.2	497.661	5.43449	0.336055
	798	797	16259	15238.3	502.172	5.2892	0.335492
	799	798	16312	15284	506.602	5.23492	0.335002
	800	799	16359	15326.4	511.014	5.12455	0.334673
	801	800	16414	15372.3	515.38	5.07382	0.334356
	802	801	16471	15417.1	519.752	4.97212	0.334089
	803	802	16525	15460.8	524.121	4.88075	0.333823
	804	803	16582	15507.4	528.44	4.84717	0.333474
	805	804	16641	15556.3	532.808	4.70976	0.333059
	806	805	16696	15603.5	537.094	4.72918	0.332539
	807	806	16754	15653.5	541.272	4.78658	0.331933
	808	807	16805	15701.8	545.347	4.84344	0.33129
	809	808	16866	15756.5	549.276	4.97488	0.330612
	810	809	16926	15805.5	553.254	4.88405	0.329837
	811	810	16980	15852.7	557.41	4.68142	0.329008
	812	811	17050	15904.9	561.928	4.36765	0.328108
	813	812	17107	15951.5	566.589	4.34558	0.327139
	814	813	17181	16006.3	571.473	4.3036	0.326069
	815	814	17239	16054.9	576.573	4.31042	0.324956
	816	815	17316	16112.3	581.986	4.29351	0.323639
	817	816	17382	16161.9	587.935	4.16868	0.322318
	818	817	17453	16217.3	594.296	4.19963	0.320889
	819	818	17522	16275.1	601.126	4.23376	0.319296
	820	819	17607	16337.3	609.135	3.94816	0.317791
	821	820	17668	16389	617.77	4.02308	0.316158
	822	821	17751	16457.2	626.868	4.17225	0.316028
	823	822	17820	16508.1	637.481	3.89935	0.316006
	824	823	17879	16553.4	649.038	3.88473	0.315927
	825	824	17950	16606.5	661.549	3.86824	0.315753
	826	825	18014	16655.4	674.97	3.85996	0.315574
	827	826	18081	16707.1	689.378	3.82494	0.315345
	828	827	18151	16755.7	704.989	3.73499	0.315245
	829	828	18220	16801.1	722.131	3.58577	0.31508
	830	829	18286	16848.1	740.01	3.6046	0.31491
	831	830	18357	16901.3	758.317	3.66885	0.314695
	832	831	18421	16953.9	777.012	3.71986	0.314577
	833	832	18487	17008.7	796.437	3.68942	0.314452
	834	833	18561	17063.8	817.046	3.57455	0.314373
	835	834	18623	17111.8	838.383	3.53582	0.314259
	836	835	18678	17167.3	858.519	3.81119	0.314348
	837	836	18763	17233	879.665	3.68405	0.314463
	838	837	18818	17276.7	902.317	3.47994	0.314582
	839	838	18889	17332.4	925.409	3.44956	0.314686
	840	839	18954	17389.3	947.931	3.56164	0.314733
	841	840	19017	17445.1	970.547	3.55713	0.314854
	842	841	19090	17503.5	993.171	3.56064	0.314939
	843	842	19152	17560.7	1015.72	3.56415	0.315039
	844	843	19221	17624.3	1038.09	3.57709	0.315093
	845	844	19284	17683.2	1060.28	3.58152	0.315051
	846	845	19354	17745.3	1082.67	3.53878	0.313098
	847	846	19442	17829.4	1104.98	3.53702	0.311056
	848	847	19531	17919.4	1127.02	3.55298	0.308982
	849	848	19627	18012.6	1148.99	3.53417	0.306899
	850	849	19719	18096.8	1171.56	3.40545	0.304607
	851	850	19816	18185.6	1193.99	3.38306	0.302404
	852	851	19909	18277.6	1216.17	3.36844	0.30017
	853	852	20023	18379.2	1237.74	3.40494	0.297982
	854	853	20103	18465.4	1258.49	3.46208	0.295866
	855	854	20210	18563.3	1278.84	3.44393	0.293782
	856	855	20302	18653.5	1298.65	3.43749	0.29171
	857	856	20402	18753.1	1317.69	3.46246	0.28964
	858	857	20492	18844.9	1335.96	3.48083	0.287545
	859	858	20585	18938.2	1353.64	3.45191	0.285448
	860	859	20692	19034.7	1371.07	3.34158	0.283452
	861	860	20790	19122.6	1388.26	3.21995	0.281453
	862	861	20888	19215.2	1404.24	3.26828	0.279417
	863	862	20992	19311.2	1419.21	3.26258	0.277448
	864	863	21093	19404.1	1433.15	3.24955	0.275603
	865	864	21193	19496.3	1445.93	3.24541	0.273735
	866	865	21291	19589.6	1457.33	3.28364	0.271899
	867	866	21399	19687.7	1467.6	3.23579	0.270175
	868	867	21499	19780.1	1476.72	3.15354	0.268528
	869	868	21601	19876.6	1484.47	3.12447	0.266909
	870	869	21713	19980.3	1490.68	3.13332	0.265278
	871	870	21827	20082.8	1495.34	3.11097	0.263646
	872	871	21934	20183.7	1498.34	3.15837	0.261601
	873	872	22046	20290.1	1499.71	3.19788	0.259726
	874	873	22169	20397	1499.46	3.18229	0.257813
	875	874	22269	20496.7	1497.64	3.23953	0.256052
	876	875	22385	20608.5	1494.3	3.29368	0.254296
	877	876	22482	20712.8	1489.53	3.36865	0.252749
	878	877	22592	20824.3	1483.23	3.35761	0.251205
	879	878	22699	20935.4	1475.38	3.32675	0.249755
	880	879	22814	21051.2	1466.01	3.30403	0.248422
	881	880	22922	21162	1455.15	3.28378	0.247223
	882	881	23029	21274.6	1443.02	3.32037	0.246026
	883	882	23141	21394.6	1429.7	3.35518	0.244948
	884	883	23257	21516.4	1414.94	3.31954	0.244057
	885	884	23368	21638.4	1398.82	3.2906	0.243322
	886	885	23490	21768.6	1381.67	3.31677	0.242639
	887	886	23612	21896.9	1363.37	3.31811	0.241599
	888	887	23737	22028.3	1344.19	3.36184	0.240502
	889	888	23861	22159.1	1324.21	3.40663	0.239503
	890	889	23977	22287.9	1303.49	3.4533	0.238603
	891	890	24114	22419.5	1281.54	3.41643	0.237692
	892	891	24233	22537	1258.21	3.35178	0.236815
	893	892	24354	22661.1	1234.03	3.35675	0.236018
	894	893	24489	22788	1208.43	3.28228	0.235207
	895	894	24610	22906.1	1181.52	3.21853	0.234458
	896	895	24732	23031.5	1154.89	3.32724	0.234151
	897	896	24855	23161	1128.77	3.46622	0.233855
	898	897	24982	23289	1101.9	3.43398	0.233598
	899	898	25107	23413.1	1074.14	3.37523	0.233388
	900	899	25225	23535.2	1045.85	3.34822	0.233161
	901	900	25358	23663.4	1017.25	3.33731	0.232879
	902	901	25478	23784.9	989.158	3.40451	0.232679
	903	902	25595	23906.7	961.759	3.48575	0.232495
	904	903	25712	24026.5	935.208	3.58083	0.232211
	905	904	25827	24140.3	908.668	3.54162	0.232681
	906	905	25932	24247.9	882.137	3.48232	0.233032
	907	906	26036	24357.5	856.322	3.49118	0.233483
	908	907	26151	24471.8	831.015	3.4506	0.233997
	909	908	26252	24582.5	806.304	3.38702	0.234624
	910	909	26373	24703.1	782.669	3.35788	0.235241
	911	910	26486	24812.8	760.665	3.37553	0.235915
	912	911	26592	24923.3	741.123	3.50726	0.236777
	913	912	26700	25039	723.616	3.5646	0.237619
	914	913	26810	25150.7	707.965	3.56758	0.238456
	915	914	26912	25255	694.018	3.48556	0.239336
	916	915	27018	25365	682.233	3.46238	0.240195
	917	916	27135	25476.5	672.828	3.46953	0.241135
	918	917	27235	25579.1	666.047	3.59387	0.242126
	919	918	27347	25686.9	661.498	3.57362	0.243181
	920	919	27448	25786.1	659.146	3.50209	0.244198
	921	920	27551	25885.9	658.991	3.47854	0.245185
	922	921	27649	25986.5	660.768	3.51656	0.246246
	923	922	27758	26095.5	664.023	3.49624	0.247058
	924	923	27864	26201.6	668.382	3.45364	0.247797
	925	924	27968	26309	673.4	3.47668	0.248276
	926	925	28077	26422.6	678.578	3.6109	0.248554
	927	926	28175	26532.6	683.605	3.77591	0.248611
	928	927	28277	26644.6	688.308	3.9398	0.248628
	929	928	28387	26752.7	692.933	3.8064	0.24839
	930	929	28477	26849.8	697.306	3.75424	0.247938
	931	930	28574	26960	701.184	3.88197	0.247265
	932	931	28681	27077.8	704.725	3.91597	0.246656
	933	932	28780	27187.4	708.071	3.89907	0.245986
	934	933	28886	27294.6	711.492	3.73345	0.245115
	935	934	28989	27399.4	715.159	3.60342	0.244251
	936	935	29092	27507.6	719.149	3.57425	0.243357
	937	936	29202	27620.1	723.355	3.60944	0.245038
	938	937	29271	27701.1	727.602	3.76189	0.246926
	939	938	29339	27782.6	731.907	3.81662	0.248932
	940	939	29408	27861.1	736.123	3.91087	0.250811
	941	940	29468	27935.6	740.2	3.94069	0.252753
	942	941	29546	28012	744.082	3.928	0.254785
	943	942	29604	28072.2	747.664	3.91685	0.256836
	944	943	29669	28134.9	750.904	3.86073	0.258982
	945	944	29724	28190.1	753.696	3.82727	0.261166
	946	945	29782	28248.8	755.969	3.8089	0.261598
	947	946	29851	28320.7	757.548	4.03035	0.262047
	948	947	29901	28390.6	758.431	4.25612	0.262417
	949	948	30005	28487.4	758.658	4.02487	0.262681
	950	949	30063	28554.4	758.141	3.94157	0.263149
	951	950	30140	28639	756.811	3.84252	0.263559
	952	951	30214	28722.9	754.683	3.8796	0.263904
	953	952	30293	28809.6	751.712	3.87204	0.264141
	954	953	30387	28900.4	747.723	3.71138	0.264603
	955	954	30474	28979	742.607	3.56859	0.261956
	956	955	30610	29105.8	736.547	3.56395	0.259697
	957	956	30737	29227.2	729.678	3.61865	0.257307
	958	957	30868	29346.5	721.852	3.55505	0.256739
	959	958	30974	29448.8	713.384	3.59856	0.256158
	960	959	31089	29556.6	704.489	3.69135	0.25566
	961	960	31204	29659.9	694.796	3.60021	0.255168
	962	961	31299	29751.1	684.636	3.58749	0.254685
	963	962	31402	29845.3	674.212	3.59904	0.254253
	964	963	31516	29936.9	663.304	3.49118	0.253852
	965	964	31613	30017.5	652.464	3.50082	0.25357
	966	965	31708	30107.5	642.36	3.68809	0.253405
	967	966	31799	30199.5	632.744	3.77544	0.252175
	968	967	31909	30298.9	623.257	3.67931	0.25086
	969	968	32006	30391.6	614.184	3.62663	0.249446
	970	969	32110	30492.4	605.781	3.64369	0.248234
	971	970	32213	30598.8	597.906	3.63681	0.247281
	972	971	32322	30708.5	590.502	3.64206	0.246347
	973	972	32426	30817.7	583.673	3.72145	0.245611
	974	973	32532	30931	577.351	3.78027	0.245207
	975	974	32626	31039.1	571.629	3.88781	0.245008
	976	975	32724	31147.3	566.544	4.00678	0.245028
	977	976	32825	31254.7	561.956	3.93587	0.245934
	978	977	32913	31352.5	558.057	3.8749	0.247077
	979	978	32998	31451.5	555.139	3.93493	0.248459
	980	979	33086	31554.2	553.338	3.9971	0.250307
	981	980	33170	31650.7	552.771	4.00785	0.25236
	982	981	33254	31740.7	553.172	3.99183	0.254182
	983	982	33330	31827.4	554.26	3.98424	0.255805
	984	983	33414	31921.6	555.776	3.95199	0.257232
	985	984	33496	32013	557.547	3.77708	0.258572
	986	985	33596	32109.3	559.324	3.64772	0.259675
	987	986	33674	32201.3	560.697	3.90597	0.257648
	988	987	33788	32339.5	561.477	4.1624	0.255345
	989	988	33920	32480.9	561.626	4.30758	0.252914
	990	989	34027	32605.5	561.13	4.47546	0.250887
	991	990	34149	32729.3	559.909	4.3721	0.248828
	992	991	34254	32843.1	557.934	4.32494	0.246467
	993	992	34369	32968.5	555.244	4.37707	0.244072
	994	993	34487	33088.2	551.706	4.26959	0.241852
	995	994	34592	33198.5	547.436	4.24887	0.239729
	996	995	34695	33312	542.757	4.34274	0.243311
	997	996	34755	33374.4	537.65	4.30822	0.247025
	998	997	34805	33430.2	532.226	4.24517	0.250933
	999	998	34853	33486.8	526.796	4.27836	0.255069
	1000	999	34901	33543.3	521.372	4.29008	0.259121
	1001	1000	34945	33598.7	515.861	4.2141	0.263167
	1002	1001	34990	33649.7	510.442	4.23521	0.267151
	1003	1002	35020	33688.7	505.294	4.34367	0.271401
	1004	1003	35070	33737.5	500.351	4.35754	0.275455
	1005	1004	35109	33776.1	495.738	4.40644	0.280527
	1006	1005	35146	33814.1	491.55	4.47999	0.285349
	1007	1006	35183	33852.4	487.85	4.55326	0.290264
	1008	1007	35207	33882.8	484.634	4.65569	0.287948
	1009	1008	35317	33996.5	481.834	4.68847	0.28559
	1010	1009	35414	34099.8	479.375	4.70313	0.283318
	1011	1010	35508	34203.9	477.208	4.77669	0.281088
	1012	1011	35614	34316.1	475.223	4.79064	0.278821
	1013	1012	35720	34426.4	473.341	4.74636	0.276557
	1014	1013	35820	34538.6	471.558	4.84249	0.273224
	1015	1014	35930	34658.3	469.805	4.88736	0.269876
	1016	1015	36034	34770.1	468.002	4.79059	0.266666
	1017	1016	36135	34877.4	466.196	4.77307	0.26704
	1018	1017	36192	34948.4	464.397	4.82007	0.267507
	1019	1018	36261	35024.7	462.554	4.72051	0.267928
	1020	1019	36329	35095.3	460.705	4.62738	0.268241
	1021	1020	36393	35164.8	458.914	4.55138	0.268618
	1022	1021	36468	35236.3	457.255	4.4421	0.270678
	1023	1022	36525	35293	455.85	4.38436	0.272842
	1024	1023	36591	35353.2	454.811	4.34074	0.275026
	1025	1024	36650	35408.9	454.261	4.42827	0.277141
	1026	1025	36708	35466.7	454.097	4.58544	0.279215
	1027	1026	36771	35527.2	454.165	4.67571	0.27815
	1028	1027	36851	35606.3	454.377	4.70187	0.276942
	1029	1028	36929	35681.5	454.702	4.71494	0.275696
	1030	1029	37006	35757.6	455.046	4.68455	0.274122
	1031	1030	37094	35838.1	455.313	4.63028	0.27231
	1032	1031	37170	35913.3	455.451	4.68358	0.270324
	1033	1032	37255	35998.1	455.416	4.79115	0.268165
	1034	1033	37338	36082.3	455.182	4.74391	0.265959
	1035	1034	37431	36166.5	454.725	4.59652	0.263493
	1036	1035	37507	36245.9	454.068	4.59039	0.260927
	1037	1036	37599	36337.7	453.286	4.67008	0.259299
	1038	1037	37669	36418	452.463	4.77957	0.257931
	1039	1038	37750	36504	451.655	4.86912	0.256514
	1040	1039	37815	36582.2	450.93	4.93201	0.254945
	1041	1040	37890	36667.6	450.384	5.01374	0.253478
	1042	1041	37965	36752.8	450.12	5.04764	0.253275
	1043	1042	38036	36829.4	450.234	5.07352	0.253126
	1044	1043	38100	36903	450.829	5.19693	0.252869
	1045	1044	38164	36979.2	451.967	5.38967	0.252616
	1046	1045	38226	37054.8	453.752	5.50144	0.250367
	1047	1046	38298	37140.8	456.298	5.50293	0.250843
	1048	1047	38363	37216.1	459.765	5.41657	0.251405
	1049	1048	38427	37285	464.257	5.13196	0.251917
	1050	1049	38488	37353.1	469.602	4.96419	0.252469
	1051	1050	38549	37425.1	475.587	5.0609	0.249197
	1052	1051	38635	37518.1	482.141	5.05673	0.245908
	1053	1052	38721	37606.2	489.247	4.95231	0.242513
	1054	1053	38796	37688.8	496.521	5.00455	0.238995
	1055	1054	38877	37771.7	503.69	5.12905	0.235652
	1056	1055	38947	37847.7	510.819	5.0931	0.232578
	1057	1056	39031	37924.4	518.041	4.88611	0.22948
	1058	1057	39104	37992.2	525.055	4.76732	0.228406
	1059	1058	39175	38056.9	531.478	4.8391	0.227171
	1060	1059	39241	38115.6	537.316	4.85676	0.225839
	1061	1060	39317	38177.2	542.647	4.79275	0.224511
	1062	1061	39380	38233.1	547.476	4.72444	0.22327
	1063	1062	39455	38294	551.893	4.59733	0.223584
	1064	1063	39507	38339.9	555.892	4.52176	0.226951
	1065	1064	39558	38379.7	559.578	4.46272	0.230492
	1066	1065	39609	38417.4	563.118	4.35725	0.23407
	1067	1066	39657	38452.6	566.561	4.3113	0.23662
	1068	1067	39713	38494.7	569.764	4.28523	0.239378
	1069	1068	39773	38534.8	572.789	4.01019	0.242337
	1070	1069	39836	38574.9	575.386	3.9207	0.245344
	1071	1070	39897	38613.4	577.461	3.90454	0.248432
	1072	1071	39938	38644.3	578.905	4.10123	0.245432
	1073	1072	40057	38750.7	579.751	4.24777	0.242372
	1074	1073	40172	38853.5	580.059	4.23115	0.239058
	1075	1074	40292	38960.3	579.89	4.18344	0.236408
	1076	1075	40418	39072.1	579.327	4.13832	0.233731
	1077	1076	40539	39181.3	578.514	4.14745	0.232059
	1078	1077	40645	39281.8	577.606	4.18708	0.230561
	1079	1078	40757	39382.6	576.693	4.16852	0.229448
	1080	1079	40861	39478.5	575.806	3.98382	0.228743
	1081	1080	40970	39583.8	575.114	4.00317	0.22867
	1082	1081	41080	39684	574.769	3.93043	0.229473
	1083	1082	41169	39769.2	575.029	3.91451	0.230992
	1084	1083	41240	39846.2	576.129	4.04992	0.233363
	1085	1084	41317	39924.4	578.332	4.06609	0.236307
	1086	1085	41387	39996.7	581.478	4.13959	0.239734
	1087	1086	41459	40070.8	585.141	4.20279	0.242378
	1088	1087	41540	40151	588.859	4.36956	0.244582
	1089	1088	41614	40230.9	592.395	4.49617	0.246628
	1090	1089	41683	40310.2	595.586	4.56797	0.248441
	1091	1090	41769	40398.5	598.365	4.48331	0.249967
	1092	1091	41847	40480.6	600.598	4.37856	0.250713
	1093	1092	41925	40566.2	602.126	4.34042	0.251461
	1094	1093	42020	40663	602.826	4.26128	0.252052
	1095	1094	42096	40749.2	602.561	4.3292	0.252658
	1096	1095	42180	40842.6	601.258	4.391	0.253319
	1097	1096	42264	40933.8	598.765	4.37267	0.244416
	1098	1097	42459	41134.8	594.827	4.18379	0.235924
	1099	1098	42650	41331.5	589.611	4.22346	0.227732
	1100	1099	42839	41522.1	583.134	4.25283	0.219757
	1101	1100	43009	41695.2	575.894	4.32774	0.224135
	1102	1101	43057	41743.5	568.167	4.43368	0.228652
	1103	1102	43096	41790.4	560.382	4.65434	0.233189
	1104	1103	43144	41838.6	552.512	4.75646	0.238169
	1105	1104	43182	41875.6	544.286	4.58427	0.243364
	1106	1105	43215	41910.9	536.248	4.60844	0.248761
	1107	1106	43240	41942.1	528.399	4.66184	0.254388
	1108	1107	43270	41975.9	520.733	4.75392	0.260206
	1109	1108	43277	42000.1	513.43	4.99236	0.266029
	1110	1109	43301	42028.4	505.869	4.86394	0.271884
	1111	1110	43306	42040.6	498.155	4.81262	0.277768
	1112	1111	43307	42054.4	490.656	4.99893	0.283474
	1113	1112	43309	42073.5	483.088	5.12747	0.281784
	1114	1113	43389	42164.9	475.201	5.05426	0.278529
	1115	1114	43481	42274	467.23	5.07871	0.275231
	1116	1115	43592	42392.7	459.087	4.98334	0.271956
	1117	1116	43689	42497	451.001	4.91919	0.268797
	1118	1117	43792	42607.6	443.322	4.92733	0.265744
	1119	1118	43910	42731.3	436.394	4.98788	0.2626
	1120	1119	44031	42857.9	430.472	5.00637	0.259446
	1121	1120	44152	42982.7	425.909	4.97953	0.25643
	1122	1121	44259	43093.6	422.951	4.85832	0.256027
	1123	1122	44344	43182.4	421.686	4.87487	0.255725
	1124	1123	44437	43276	421.977	4.86667	0.255856
	1125	1124	44528	43362.1	423.787	4.6658	0.253836
	1126	1125	44631	43461.3	427.147	4.71997	0.25221
	1127	1126	44728	43556.8	431.793	4.77051	0.250365
	1128	1127	44826	43650.5	437.458	4.78255	0.248283
	1129	1128	44923	43738.3	443.984	4.69855	0.246204
	1130	1129	45008	43818.1	450.969	4.7071	0.243706
	1131	1130	45101	43906.5	458.038	4.76583	0.241252
	1132	1131	45199	43995.4	465.048	4.74584	0.238528
	1133	1132	45268	44073.6	471.137	5.17997	0.235335
	1134	1133	45359	44167.3	476.659	5.16246	0.23216
	1135	1134	45447	44256.2	481.504	5.10518	0.228768
	1136	1135	45539	44349.4	485.515	5.09065	0.22516
	1137	1136	45637	44454.3	488.513	5.16206	0.223639
	1138	1137	45723	44545.4	490.498	5.13859	0.222104
	1139	1138	45808	44637.4	491.412	5.18683	0.22066
	1140	1139	45883	44730.4	491.255	5.49191	0.219414
	1141	1140	45965	44822.5	490.043	5.49182	0.218169
	1142	1141	46039	44911.1	487.797	5.51721	0.217003
	1143	1142	46115	44999.8	484.49	5.50702	0.215738
	1144	1143	46196	45090.1	480.051	5.37802	0.214493
	1145	1144	46274	45180.6	474.705	5.44564	0.213358
	1146	1145	46352	45270.6	468.532	5.49306	0.212157
	1147	1146	46430	45355.6	461.731	5.5278	0.213652
	1148	1147	46494	45425.9	454.463	5.57278	0.214932
	1149	1148	46547	45493.6	447.065	5.74252	0.216177
	1150	1149	46605	45563.9	439.621	5.84271	0.217408
	1151	1150	46666	45635.1	432.241	5.96465	0.214564
	1152	1151	46744	45725.4	425.133	6.05996	0.211935
	1153	1152	46820	45812.9	418.528	6.13404	0.209284
	1154	1153	46899	45899.8	412.618	6.10606	0.206719
	1155	1154	46971	45980.7	407.763	6.06792	0.204182
	1156	1155	47042	46063.8	404.369	6.05236	0.201435
	1157	1156	47123	46153.2	402.81	5.95328	0.198719
	1158	1157	47199	46236.3	403.519	5.96954	0.196242
	1159	1158	47272	46319.1	406.673	6.00168	0.193945
	1160	1159	47347	46400.7	411.942	5.96894	0.191739
	1161	1160	47424	46479.1	419.049	5.89424	0.189577
	1162	1161	47499	46552.6	427.949	5.66846	0.187749
	1163	1162	47576	46626.1	438.008	5.63836	0.187617
	1164	1163	47649	46692.4	448.77	5.57692	0.187637
	1165	1164	47722	46755.9	459.752	5.53646	0.187508
	1166	1165	47793	46820	470.574	5.48524	0.187369
	1167	1166	47875	46888.5	481.092	5.34086	0.187442
	1168	1167	47950	46951.6	490.762	5.34012	0.187485
	1169	1168	48023	47020	498.981	5.59153	0.187472
	1170	1169	48111	47097.4	506.178	5.47484	0.187607
	1171	1170	48192	47168.2	512.23	5.38853	0.187645
	1172	1171	48269	47239.5	517.05	5.3762	0.186677
	1173	1172	48366	47326.6	520.707	5.30637	0.18567
	1174	1173	48461	47412.3	523.413	5.01398	0.184435
	1175	1174	48568	47506.9	525.207	5.00147	0.183556
	1176	1175	48668	47599.8	526.355	5.03997	0.182602
	1177	1176	48770	47693.2	527.229	5.03085	0.181884
	1178	1177	48869	47782.3	528.325	4.95718	0.181076
	1179	1178	48971	47876.9	530.217	4.96682	0.180217
	1180	1179	49082	47977.3	533.517	4.99837	0.179693
	1181	1180	49187	48070.1	538.871	5.0202	0.179142
	1182	1181	49286	48167.3	546.363	5.21158	0.178426
	1183	1182	49389	48267.6	555.97	5.21684	0.177723
	1184	1183	49492	48367.2	567.738	5.11655	0.176997
	1185	1184	49586	48465.6	581.198	5.15831	0.176168
	1186	1185	49691	48575.1	595.946	5.20558	0.175313
	1187	1186	49790	48683.7	611.346	5.33383	0.174058
	1188	1187	49899	48797.6	627.296	5.35521	0.172929
	1189	1188	50000	48906.9	643.616	5.31791	0.17178
	1190	1189	50108	49018.1	660.229	5.20939	0.170524
	1191	1190	50217	49126.7	677.235	4.98104	0.169257
	1192	1191	50329	49238	693.285	5.05656	0.167928
	1193	1192	50440	49348.6	708.035	5.10269	0.167224
	1194	1193	50542	49452	720.902	5.2642	0.166509
	1195	1194	50645	49555.8	732.109	5.24295	0.16555
	1196	1195	50751	49659.6	741.59	5.13047	0.164678
	1197	1196	50861	49764.7	748.917	5.13359	0.163927
	1198	1197	50968	49869	753.861	5.19823	0.16315
	1199	1198	51081	49979	756.38	5.16281	0.162378
	1200	1199	51187	50084	756.346	5.11995	0.161647
	1201	1200	51286	50190.9	753.75	5.27115	0.160735
	1202	1201	51396	50303.2	748.443	5.20657	0.159747
	1203	1202	51506	50411.7	740.239	5.0631	0.158771
	1204	1203	51618	50521.3	729.435	5.10317	0.157678
	1205	1204	51730	50631.3	716.296	5.21295	0.1566
	1206	1205	51832	50738.9	701.167	5.37495	0.155753
	1207	1206	51940	50853.2	683.684	5.37009	0.154864
	1208	1207	52048	50964.6	663.817	5.32526	0.153872
	1209	1208	52150	51073.6	641.93	5.33169	0.152746
	1210	1209	52265	51192.3	618.221	5.33776	0.1515
	1211	1210	52378	51306.7	592.869	5.30742	0.150447
	1212	1211	52482	51417.7	566.177	5.25301	0.149295
	1213	1212	52598	51535.1	538.398	5.15099	0.147916
	1214	1213	52711	51651.2	511.021	5.18564	0.146592
	1215	1214	52833	51770.4	485.015	5.25146	0.145418
	1216	1215	52948	51881.6	460.651	5.17889	0.144043
	1217	1216	53066	51995.7	439.554	5.20345	0.142486
	1218	1217	53185	52115	423.038	5.27706	0.141037
	1219	1218	53303	52237.9	412.308	5.57879	0.139651
	1220	1219	53416	52360.2	407.012	5.5734	0.138164
	1221	1220	53531	52482.7	407.218	5.58995	0.136503
	1222	1221	53645	52607.7	411.163	5.56364	0.135162
	1223	1222	53768	52738	417.419	5.4691	0.133934
	1224	1223	53889	52865.9	424.302	5.42787	0.132812
	1225	1224	54009	52992.5	430.468	5.36107	0.131866
	1226	1225	54133	53116	435.008	5.21778	0.130721
	1227	1226	54269	53242.3	437.27	5.16585	0.129471
	1228	1227	54403	53364.5	437.172	5.13198	0.128332
	1229	1228	54535	53488	435.249	5.24085	0.127154
	1230	1229	54672	53613.7	432.505	5.18133	0.125513
	1231	1230	54819	53747.2	430.762	4.96656	0.123823
	1232	1231	54975	53884.3	433.075	4.81992	0.122187
	1233	1232	55123	54022.3	442.556	4.96371	0.120593
	1234	1233	55272	54170.3	458.394	5.19655	0.118935
	1235	1234	55427	54321.8	481.065	5.10927	0.117381
	1236	1235	55585	54470.7	511.039	4.89565	0.115852
	1237	1236	55750	54620.5	547.522	4.70712	0.114204
	1238	1237	55923	54777.8	589.079	4.55687	0.112658
	1239	1238	56105	54944.7	634.417	4.40815	0.111098
	1240	1239	56294	55110.7	680.795	4.3827	0.10968
	1241	1240	56437.8	55236.9	715.225	4.57631	0.108318
	1242	1241	56578.4	55364.7	745.215	4.80841	0.106959
	1243	1242	56714.7	55494.3	771.555	4.87307	0.1055
	1244	1243	56846.7	55625.6	794.258	4.85986	0.104063
	1245	1244	56972.4	55758.8	812.624	4.88103	0.102695
	1246	1245	57096	55893.6	825.697	4.99666	0.101374
	1247	1246	57217.3	56030.3	833.299	5.11035	0.100026
	1248	1247	57335.3	56168.9	835.867	5.09335	0.0986417
	1249	1248	57456.2	56309.3	833.064	5.1535	0.0973198
	1250	1249	57582.9	56451.6	824.839	5.26042	0.0961092
	1251	1250	57717.5	56595.2	811.556	5.26938	0.0951372
	1252	1251	57853.1	56740.1	793.822	5.08589	0.0943358
	1253	1252	57986.9	56886.2	772.188	5.19808	0.0935903
	1254	1253	58121.8	57033.8	747.575	5.45078	0.0926144
	1255	1254	58259.7	57182.8	721.071	5.67163	0.0917758
	1256	1255	58405.5	57332.8	694.39	5.58797	0.0911328
	1257	1256	58552	57483.9	670.132	5.51817	0.0904489
	1258	1257	58716.8	57658	645.868	5.56672	0.0896992
	1259	1258	58879.5	57833.6	630.769	5.54032	0.0888914
	1260	1259	59044.7	58009.9	628.184	5.46754	0.0885714
	1261	1260	59212	58187.1	638.798	5.40808	0.0881212
	1262	1261	59360.8	58350.9	666.987	5.40886	0.087587
	1263	1262	59508.1	58515.5	703.94	5.42305	0.0871358
	1264	1263	59668.8	58681.1	748.821	5.34699	0.0866188
	1265	1264	59868.1	58878.9	796.784	5.3335	0.0860395
	1266	1265	60077.1	59078	897.932	5.25967	0.0854922
	1267	1266	60279.8	59278.3	995.253	5.13455	0.0849923
	1268	1267	60489.9	59480.1	1088.35	5.05156	0.0843097
	1269	1268	60701.8	59683.5	1176.11	5.02364	0.0836968
	1270	1269	60912.6	59888.2	1257.3	5.0581	0.0831229
	1271	1270	61127.3	60094.3	1331.05	5.13603	0.0825968
	1272	1271	61349.1	60301.7	1398.18	5.13735	0.0820605
	1273	1272	61573.9	60510.5	1459.05	5.07689	0.0814872
	1274	1273	61799.5	60721.2	1513.28	5.0305	0.0807813
	1275	1274	62021.2	60933.5	1562.86	4.69513	0.0801499
	1276	1275	62240.1	61147.4	1604.54	4.6462	0.0795613
	1277	1276	62455.2	61363.2	1637.48	4.63076	0.0788918
	1278	1277	62674	61580.7	1661.63	4.48423	0.0782443
	1279	1278	62901.2	61800.2	1675.91	4.42932	0.0775315
	1280	1279	63146.2	62021.5	1679.65	4.37757	0.0769016
	1281	1280	63398.6	62244.8	1672.37	4.33352	0.0762183
	1282	1281	63657.2	62470.2	1656.42	4.76896	0.0755091
	1283	1282	63913.8	62697.7	1631.08	4.89663	0.0748149
	1284	1283	64165.7	62927	1595.85	4.93182	0.0741936
	1285	1284	64413.8	63159.1	1551.91	4.60073	0.0733524
	1286	1285	64654.4	63393.6	1497.74	4.61885	0.0725646
	1287	1286	64879	63630.5	1435.03	4.72689	0.0718283
	1288	1287	65096.6	63870.3	1363.15	4.77505	0.0709841
	1289	1288	65316	64112.7	1280.32	4.7079	0.0702098
	1290	1289	65629	64447.8	1183.7	4.55955	0.0694373
	1291	1290	65964.6	64786.3	1081.42	4.68256	0.0687458
	1292	1291	66320.4	65127.9	971.955	4.70451	0.0681122
	1293	1292	66670.3	65472.7	855.666	4.69118	0.0674859
	1294	1293	67021.3	65821	734.253	4.67125	0.0668051
	1295	1294	67380.8	66173.2	609.888	4.62022	0.066071
	1296	1295	67743.9	66529.4	489.099	4.59104	0.065326
	1297	1296	68097.8	66889.6	388.924	4.77212	0.0645922
	1298	1297	68465	67254.4	323.44	4.77165	0.0637889
	1299	1298	68838.5	67624.4	318.189	4.73615	0.0628884
	1300	1299	69206.4	68001.3	367.271	4.80996	0.0617451
	1301	1300	69580.2	68387.5	436.256	4.9936	0.0602448
	1302	1301	69956.7	68786.2	503.671	5.40668	0.0583658
	1303	1302	70334.4	69199.5	565.207	5.57693	0.0562956
	1304	1303	70690.1	69625	527.487	5.64173	0.0546855
	1305	1304	71074.6	70066	468.002	5.50143	0.0527703
	1306	1305	71514.6	70525.5	513.342	5.41513	0.05064
	1307	1306	72032	71002.3	537.641	5.20161	0.0488003
	1308	1307	72441.6	71364.9	559.874	4.86968	0.0471041
	1309	1308	72840.4	71739.3	576.263	5.03702	0.0456189
	1310	1309	73200.5	72132.8	586.763	5.13168	0.0434089
	1311	1310	73549.7	72544.2	591.459	5.68757	0.0415085
	1312	1311	73927.3	72972.6	592.429	5.82874	0.0398672
	1313	1312	74349.5	73416.5	592.739	5.81779	0.0384776
	1314	1313	74831.6	73874.5	596.945	5.64754	0.0372898
	1315	1314	75365.8	74344.6	610.426	5.12871	0.0363364
	1316	1315	75901.9	74825.9	628.235	5.02452	0.0354886
	1317	1316	76342.8	75265.7	643.81	4.98875	0.0347371
	1318	1317	76767.3	75710.6	650.942	5.23826	0.0343418
	1319	1318	77201.1	76159.9	646.789	5.2247	0.0340002
	1320	1319	77651.4	76612.4	630.076	5.14955	0.0337653
	1321	1320	78109.6	77067	602.313	5.18173	0.0336091
	1322	1321	78556	77521.7	568.104	5.31054	0.0335989
	1323	1322	78992.3	77976.6	533.561	5.37955	0.0335797
	1324	1323	79428.2	78433	507.572	5.53013	0.0334764
	1325	1324	79864.3	78890.7	498.065	5.64803	0.0333813
	1326	1325	80296	79349.9	497.335	5.90064	0.0332687
	1327	1326	80729.4	79810.6	498.299	5.94358	0.0331676
	1328	1327	81178.8	80277.2	497.473	6.08309	0.0328478
	1329	1328	81639.5	80749.3	495.041	6.10315	0.032467
	1330	1329	82106.5	81228.2	495.14	6.17376	0.0320016
	1331	1330	82582.4	81711.1	503.517	6.56081	0.0317424
	1332	1331	83050.1	82198.5	526.353	6.63402	0.0314421
	1333	1332	83509.8	82689	559.249	6.63853	0.0312489
	1334	1333	83998.9	83182.8	596.904	6.3032	0.0310412
	1335	1334	84487.5	83646	630.297	6.30076	0.0311509
	1336	1335	84963.7	84109.2	662.92	6.2592	0.0311579
	1337	1336	85490.5	84620.5	719.89	6.09449	0.0312124
	1338	1337	86031.9	85132.3	739.617	5.91315	0.0311807
	1339	1338	86598.1	85646.3	720.158	5.52736	0.0310484
	1340	1339	87186.9	86164.4	660.028	5.13988	0.0307989
	1341	1340	87772.5	86689.6	568.501	4.94744	0.03039
	1342	1341	88323.9	87224.8	477.177	4.99889	0.0298159
	1343	1342	88839.7	87772.4	445.079	5.24149	0.0291412
	1344	1343	89346.7	88334.5	520.117	5.53462	0.0283933
	1345	1344	89875.3	88910.3	652.666	5.71134	0.0277131
	1346	1345	90444.9	89500	788.736	5.77956	0.0270636
	1347	1346	91058	90131.7	872.547	5.83883	0.0263097
	1348	1347	91649	90731.4	926.897	5.91839	0.0257004
	1349	1348	92242	91336.8	942.725	5.9685	0.0252234
	1350	1349	92841	91949.8	917.021	6.11908	0.0249337
	1351	1350	93426	92561.3	854.147	6.35476	0.0248174
	1352	1351	94011	93167.9	762.064	6.39742	0.0248998
	1353	1352	94593	93752.3	660.615	6.43482	0.0251331
	1354	1353	95155	94320.3	587.126	6.49616	0.0254257
	1355	1354	95710	94874.9	592.882	6.47447	0.0259136
	1356	1355	96252	95416	678.66	6.5554	0.0264573
	1357	1356	96833.2	96000	797.958	6.58912	0.0268102
	1358	1357	97344.1	96515.4	890.713	6.68486	0.0274086
	1359	1358	97841.4	97023.2	972.211	6.75802	0.027818
	1360	1359	98343.8	97522.8	1033.56	6.72216	0.0282764
	1361	1360	98840.1	98017.6	1068.3	6.77205	0.0285521
	1362	1361	99334.5	98511.7	1073.85	6.74863	0.0285917
	1363	1362	99841.4	99008.2	1048.08	6.60202	0.0284539
	1364	1363	100355	99509.9	989.385	6.5247	0.0281532
	1365	1364	100860	100021	898.885	6.60498	0.0276251
	1366	1365	101370	100545	778.6	6.71414	0.0269527
	1367	1366	101926	101083	630.287	6.68466	0.0262547
	1368	1367	102550	101640	553.669	5.86457	0.0253967
	1369	1368	103040	102074	529.272	5.57157	0.0244069
	1370	1369	103670	102653	554.083	5.33572	0.0233303
	1371	1370	104294	103262	609.363	5.2203	0.0221901
	1372	1371	104906	103906	674.18	5.56761	0.020943
	1373	1372	105546	104588	741.58	5.66235	0.0198138
	1374	1373	106228	105297	792.88	5.70484	0.0190275
	1375	1374	106910	106040	812.573	6.49731	0.0181875
	1376	1375	107640	106807	798.807	6.23117	0.0175899
	1377	1376	108683	107806	750.007	5.76632	0.0172595
	1378	1377	109775	108807	680.78	5.35937	0.0172446
	1379	1378	110771	109787	635.263	5.43139	0.0175861
	1380	1379	111709	110733	731.28	5.49998	0.0182315
	1381	1380	112627	111660	1032.24	5.57564	0.0186026
	1382	1381	113504	112558	1089.85	5.70771	0.0193166
	1383	1382	114305	113390	1142.47	5.91265	0.0197269
	1384	1383	115083	114191	1205.41	6.01627	0.0199051
	1385	1384	115825	114962	1292.53	6.26178	0.0197736
	1386	1385	116547	115718	1385.46	6.38041	0.0197482
	1387	1386	117204	116451	1459.04	7.4246	0.0194551
	1388	1387	117874	117187	1513.69	7.84064	0.019296
	1389	1388	118463	117833	1548.62	8.41022	0.0192451
	1390	1389	119042	118430	1569.63	8.36234	0.0192875
	1391	1390	119617	118995	1583.46	8.24131	0.0194339
	1392	1391	120177	119547	1599.21	8.18447	0.0197102
	1393	1392	120735	120098	1627.36	8.06561	0.0201042
	1394	1393	121293	120644	1674.01	7.95685	0.0206063
	1395	1394	121845	121183	1727.76	7.8149	0.0211138
	1396	1395	122386	121718	1775.85	7.8023	0.0217757
	1397	1396	122912	122244	1808.96	7.82298	0.0224434
	1398	1397	123428	122761	1820.99	7.89247	0.0230807
	1399	1398	123927	123263	1808.62	7.87975	0.0237119
	1400	1399	124413	123746	1770.1	7.83836	0.0242198
	1401	1400	124893	124220	1705.51	7.82914	0.0246462
	1402	1401	125362	124686	1616.18	7.81796	0.0249855
	1403	1402	125823	125144	1505.81	7.854	0.0252
	1404	1403	126269	125601	1381.17	7.95926	0.0253433
	1405	1404	126691	126058	1261.07	8.81561	0.0253821
	1406	1405	127105	126513	1146.42	9.17362	0.0253536
	1407	1406	127496	126935	1048.27	9.42273	0.0253528
	1408	1407	127873	127332	982.716	9.85826	0.0252442
	1409	1408	128231	127717	961.962	10.5354	0.025165
	1410	1409	128574	128086	983.966	10.5696	0.0251124
	1411	1410	128927	128438	1036.96	10.3894	0.0249792
	1412	1411	129284	128779	1108.36	10.1409	0.0248595
	1413	1412	129632	129118	1185.1	10.0686	0.0247222
	1414	1413	130001	129470	1263.38	9.43265	0.0245079
	1415	1414	130403	129831	1341.03	8.5589	0.0242637
	1416	1415	130833	130209	1411.33	8.2285	0.0239719
	1417	1416	131290	130626	1476.25	7.83842	0.0234574
	1418	1417	131792	131076	1544.78	7.19048	0.0228095
	1419	1418	132343	131556	1630.79	6.63258	0.022075
	1420	1419	132963	132092	1748.51	5.90257	0.0212966
	1421	1420	133661	132699	1873.01	5.53579	0.0206954
	1422	1421	134431	133398	1979.73	5.17046	0.0199664
	1423	1422	135338	134204	2042.7	4.74189	0.0194101
	1424	1423	136363	135077	2039.27	4.08312	0.0189516
	1425	1424	137438	136050	1974.98	4.0622	0.0187439
	1426	1425	138624	137207	1901.95	3.93277	0.0186571
	1427	1426	139867	138427	1934.42	3.96249	0.0186628
	1428	1427	141082	139660	2152.27	4.01336	0.0187356
	1429	1428	142282	140891	2456	4.12991	0.018797
	1430	1429	143466	142101	2764.79	4.17149	0.0190004
	1431	1430	144585	143256	3016.68	4.31359	0.0194809
	1432	1431	145669	144369	3193.27	4.36237	0.0198784
	1433	1432	146768	145433	3288.52	4.17788	0.0204861
	1434	1433	147769	146427	3296.51	4.26179	0.0212937
	1435	1434	148708	147429	3234.82	4.56855	0.0222785
	1436	1435	149598	148398	3115.18	4.71753	0.0234086
	1437	1436	150486	149284	2939.95	4.5323	0.024869
	1438	1437	151290	150055	2731.79	4.57333	0.0265265
	1439	1438	151995	150771	2508.9	4.61973	0.0283929
	1440	1439	152681	151473	2290.67	4.65236	0.0305002
	1441	1440	153331	152122	2096.23	4.6242	0.0327792
	1442	1441	153933	152711	1950.52	4.59749	0.0353478
	1443	1442	154485	153236	1874.19	4.46051	0.0382928
	1444	1443	155006	153720	1884.26	4.30563	0.0415358
	1445	1444	155463	154161	1943.99	4.61898	0.0446388
	1446	1445	155854	154632	2014.55	5.24285	0.0473821
	1447	1446	156222	155104	2083.26	5.4877	0.0496603
	1448	1447	156634	155561	2153.29	4.9435	0.0514227
	1449	1448	157029	155933	2217.25	4.6529	0.0526171
	1450	1449	157408	156244	2268.27	4.61846	0.0532478
	1451	1450	157795	156575	2304.18	4.64719	0.0533682
	1452	1451	158154	156924	2323.08	4.65204	0.0534685
	1453	1452	158522	157291	2323.54	4.59226	0.0534746
	1454	1453	158892	157662	2304.72	4.62015	0.0533643
	1455	1454	159254	158025	2266.78	4.67758	0.053256
	1456	1455	159625	158396	2209.56	4.64834	0.0531011
	1457	1456	159995	158769	2133.78	4.58167	0.0527206
	1458	1457	160366	159135	2043.62	4.6135	0.0521299
	1459	1458	160748	159514	1945.23	4.67429	0.0514644
	1460	1459	161128	159901	1845.16	4.68035	0.0505957
	1461	1460	161510	160293	1753.99	4.67068	0.0495195
	1462	1461	161896	160689	1687.91	4.85844	0.0483846
	1463	1462	162266	161101	1656.55	5.23104	0.0474142
	1464	1463	162628	161518	1644.44	5.33974	0.0467958
	1465	1464	163021	161935	1641.81	4.79771	0.0463943
	1466	1465	163434	162304	1642.17	4.61823	0.0460226
	1467	1466	163864	162664	1637.92	4.52004	0.0458737
	1468	1467	164285	163033	1626.14	4.4572	0.0456369
	1469	1468	164717	163448	1612.51	4.46778	0.0452691
	1470	1469	165150	163881	1607.09	4.61874	0.044726
	1471	1470	165580	164353	1620.65	4.8201	0.0438725
	1472	1471	166004	164833	1661.55	5.09669	0.0429114
	1473	1472	166456	165311	1720.65	4.77628	0.0416152
	1474	1473	166933	165750	1786.3	4.44126	0.0399594
	1475	1474	167460	166196	1838.47	4.3751	0.0379391
	1476	1475	168000	166702	1859.64	4.37921	0.0355493
	1477	1476	168562	167270	1839.46	4.54059	0.0329166
	1478	1477	169155	167898	1777.63	4.61605	0.0303754
	1479	1478	169801	168583	1685.54	4.65821	0.0278672
	1480	1479	170547	169310	1592.61	4.37728	0.0254026
	1481	1480	171366	170050	1578.14	4.21294	0.0229555
	1482	1481	172262	170910	1597.07	4.20267	0.0210759
	1483	1482	173238	171909	1626.68	4.3209	0.0196748
	1484	1483	174265	173002	1726.73	4.62963	0.0186072
	1485	1484	175260	174130	1972.66	5.19231	0.0178675
	1486	1485	176292	175252	2273.29	5.33006	0.0171124
	1487	1486	177405	176286	2595.34	4.6678	0.0163518
	1488	1487	178528	177295	2821.41	4.54032	0.015701
	1489	1488	179785	178520	2878.67	4.45853	0.0150492
	1490	1489	181108	179845	2730.65	4.49369	0.0143906
	1491	1490	182490	181260	2396.37	4.64529	0.0137886
	1492	1491	183847	182718	1981.43	5.18353	0.0132365
	1493	1492	185175	184162	1603.85	5.50661	0.0127168
	1494	1493	186496	185541	1466.09	5.66741	0.0122532
	1495	1494	187872	186886	1513.17	5.36719	0.0118984
	1496	1495	189298	188238	1784.81	5.07359	0.0116582
	1497	1496	190762	189690	1964.45	5.07622	0.011909
	1498	1497	192249	191187	1948.22	5.09819	0.0126559
	1499	1498	193657	192599	1831.94	5.18655	0.0140091
	1500	1499	194859	193853	1800.48	5.5235	0.0159562
	1501	1500	195868	194950	1941.76	6.1273	0.018594
	1502	1501	196678	195827	2124.76	6.55088	0.0211059
	1503	1502	197313	196526	2284.08	7.14948	0.023409
	1504	1503	197871	197132	2409.5	7.39674	0.0251732
	1505	1504	198366	197662	2494.32	7.85528	0.026287
	1506	1505	198832	198143	2545.91	7.57201	0.0269904
	1507	1506	199299	198591	2565.65	7.25512	0.0271186
	1508	1507	199757	199020	2553.26	7.2898	0.0270576
	1509	1508	200193	199460	2510.23	7.46298	0.0268096
	1510	1509	200649	199933	2439.91	7.49757	0.0263684
	1511	1510	201160	200400	2337.47	6.2967	0.025688
	1512	1511	201744	200861	2238.72	5.73811	0.024592
	1513	1512	202393	201375	2200.39	5.16856	0.0230688
	1514	1513	203095	202005	2217.49	5.21193	0.0210899
	1515	1514	203888	202832	2292.29	5.27827	0.018862
	1516	1515	204781	203759	2475.32	5.49386	0.0167784
	1517	1516	205719	204777	2849.19	5.93031	0.0146975
	1518	1517	206758	205898	3301.83	6.39265	0.0130966
	1519	1518	207879	207046	3761.63	6.39155	0.0118107
	1520	1519	209065	208243	4130.78	6.49746	0.0108092
	1521	1520	210332	209541	4331.78	6.81123	0.0100827
	1522	1521	211591	210892	4329.99	7.8521	0.00960606
	1523	1522	212859	212190	4125.89	7.70123	0.00934881
	1524	1523	214166	213443	3713.05	7.11389	0.00930039
	1525	1524	215576	214740	3189.26	6.48338	0.00944134
	1526	1525	217094	216097	2919.41	5.36824	0.00980655
	1527	1526	218728	217612	3615.4	5.00365	0.0104874
	1528	1527	220409	219261	4743.6	4.86432	0.0111468
	1529	1528	222042	220914	5844.02	4.97328	0.0118327
	1530	1529	223599	222488	6793.42	5.03871	0.0125824
	1531	1530	225077	223927	7613.7	4.8223	0.01329
	1532	1531	226403	225270	8242.52	4.96233	0.0138097
	1533	1532	227707	226648	8674.04	5.28037	0.0141359
	1534	1533	228926	227936	8925.43	5.66895	0.014253
	1535	1534	230063	229124	9025.09	5.70366	0.01416
	1536	1535	231145	230248	8967.92	5.52434	0.0140482
	1537	1536	232277	231362	8730.77	5.03038	0.0139078
	1538	1537	233671	232547	8323.35	5.07141	0.0135106
	1539	1538	235031	233913	7796.13	5.62084	0.0130964
	1540	1539	236213	235245	7151.36	6.0135	0.0126881
	1541	1540	237419	236478	6412.18	6.43284	0.0122061
	1542	1541	238540	237706	5591.18	6.75052	0.0116174
	1543	1542	239724	238900	4812.72	7.83679	0.0109283
	1544	1543	240760	240051	4060.35	8.16187	0.0102391
	1545	1544	241812	241182	3446.14	8.34077	0.00956465
	1546	1545	242966	242313	3157.47	8.95993	0.0089417
	1547	1546	244051	243486	3075.34	8.20043	0.00807508
	1548	1547	245380	244737	3455.42	5.85546	0.00710797
	1549	1548	247513	246634	5232.11	5.15592	0.00595753
	1550	1549	250487	249436	7815.89	4.52725	0.0050681
	1551	1550	254459	253252	9762.24	5.02911	0.0044237
	1552	1551	258541	257457	10710	5.11391	0.00405809
	1553	1552	262855	261829	10362.7	5.12775	0.0039372
	1554	1553	267315	266299	8711.43	5.0145	0.00408248
	1555	1554	271713	270689	6307.71	4.93134	0.00450068
	1556	1555	275784	274739	4953.57	4.89048	0.00522923
	1557	1556	279312	278264	6753.86	4.77541	0.00635858
	1558	1557	282356	281208	9459.42	4.7293	0.00751664
	1559	1558	285114	283764	11441	6.10341	0.0087117
	1560	1559	286567	285739	13229.3	5.92545	0.0099936
	1561	1560	288084	287223	14857.7	5.68587	0.0112587
	1562	1561	289495	288585	16357.4	5.36263	0.0125453
	1563	1562	290899	289873	17638.8	5.41259	0.0138084
	1564	1563	292112	291103	18707.2	5.54272	0.0150126
	1565	1564	293220	292219	19543	5.86295	0.0164046
	1566	1565	294189	293214	20159.8	6.42313	0.0177114
	1567	1566	294935	294090	20625.3	6.67377	0.0188924
	1568	1567	295623	294837	20973.1	6.68767	0.019829
	1569	1568	296295	295522	21211.8	6.65391	0.0205581
	1570	1569	296916	296175	21349	6.4141	0.0210372
	1571	1570	297582	296799	21381.1	5.95251	0.0212376
	1572	1571	298315	297462	21294	5.78181	0.0210852
	1573	1572	299099	298166	21078.2	5.78897	0.0206184
	1574	1573	300002	298937	20780.9	7.15971	0.0198807
	1575	1574	300489	299728	20339.1	7.18157	0.0190179
	1576	1575	301120	300425	19720	7.03905	0.0180477
	1577	1576	301808	301117	18885.3	6.85363	0.0169617
	1578	1577	302551	301850	17723.7	6.15639	0.0161295
	1579	1578	303540	302672	16309.7	6.16175	0.0153245
	1580	1579	304488	303640	14632.4	6.2562	0.0144814
	1581	1580	305510	304643	12732.1	6.52378	0.0137108
	1582	1581	306523	305687	10587.3	6.62911	0.0130728
	1583	1582	308179	306760	8282.47	6.78405	0.0124661
	1584	1583	314138	307838	6045.61	6.76711	0.0118871
